# Supplementary material for: The data of the Swedish Malaise Trap Project, a countrywide inventory of Sweden's insect fauna
Source: Biodivers Data J. 2020 Oct 23;8:e56286. doi: 10.3897/BDJ.8.e56286 (PMC7599202; doi:10.3897/BDJ.8.e56286)
Supplement: Supplementary material 1 — Trapping site information [file bdj-08-e56286-s001.csv]

TrapID	Locality name on label	Country	Province	Province abbreviation	County	Parish	Locality	Complete locality name	Latitude	Longitude	GPS precision	Biogeographic region	Method	Habitat	Habitat class	Trap head direction	Altitude m.s.l.	Vegetation	Running period start	Running period end	Number of samples
1	Sö Åva Spirudden	Sweden	Södermanland	Sö	Tyresö kommun	Tyresö socken	Tyresta, Åva, Spirudden	SE, Sö, Tyresö kommun, Tyresö socken, Tyresta, Åva, Spirudden	59.171883	18.369950	10 m	boreonemoral	Malaise trap, Townes model	Coastal mixed dense oak-ash forest	Forest: nemoral deciduous forest	202°	10	Acer pseudoplatanus, Anthriscus sylvestris, Fraxinus excelsior, Geum urbanum, Laserpitium latifolium, Quercus robur, Rosa sp., Sorbus intermedia, Tilia cordata, Ulmus glabra	2003-06-08	2006-04-03	33
2	Sö Tyresta Ungfars mosse	Sweden	Södermanland	Sö	Tyresö kommun	Tyresö socken	Tyresta NP, Ungfars mosse	SE, Sö, Tyresö kommun, Tyresö socken, Tyresta NP, Ungfars mosse	59.178300	18.229433	10 m	boreonemoral	Malaise trap, Townes model	Sphagnum bog in pine forest	Open meagre dry habitat	350°	64	Andromeda polifolia, Betula pubescens, Calluna vulgaris, Eriophorum angustifolium, Myrica gale, Pinus sylvestris, Sphagnum spp.	2003-06-08	2006-05-08	29
3	Sö Tyresta Urskogsslingan pine forest	Sweden	Södermanland	Sö	Haninge kommun	Österhaninge socken	Tyresta NP, Urskogsslingan	SE, Sö, Haninge kommun, Österhaninge socken, Tyresta NP, Urskogsslingan	59.176800	18.246933	10 m	boreonemoral	Malaise trap, Townes model	"Hällmarkstallskog": open pine forest on partly bare granite bedrock	Forest: coniferous forest	180°	69	Calluna vulgaris, Cladonia sp., Picea abies, Pinus sylvestris, Vaccinium myrtillus.	2003-06-08	2006-05-08	31
4	Sö Tyresta Urskogsslingan spruce forest	Sweden	Södermanland	Sö	Haninge kommun	Österhaninge socken	Tyresta NP, Urskogsslingan	SE, Sö, Haninge kommun, Österhaninge socken, Tyresta NP, Urskogsslingan	59.175900	18.247583	10 m	boreonemoral	Malaise trap, Townes model	Old-growth spruce forest with blueberry	Forest: coniferous forest	180°	67	Maianthemum bifolium, Picea abies, Populus tremula, Sphagnum spp., Vaccinium myrtillus, Vacciniuim vitis-idaea	2003-06-08	2006-05-08	31
5	Sö Sofielundstippen garbage	Sweden	Södermanland	Sö	Huddinge kommun	Huddinge socken	Sofielunds återvinningsanläggning	SE, Sö, Huddinge kommun, Huddinge socken, Sofielunds återvinningsanläggning	59.176533	17.993850	10 m	boreonemoral	Malaise trap, Townes model	Dry aspen-pine forest at garbage dump edge with much rubbish	Forest: boreal deciduous forest	202°	77	Calluna vulgaris, Convallaria majalis, Picea abies, Pinus sylvestris, Populus tremula, Quercus robur, Sorbus aucuparia, Vacciniuim vitis-idaea	2003-06-16	2004-10-20	30
6	Up Marma skjutfält	Sweden	Uppland	Up	Älvkarleby kommun	Älvkarleby socken	Marma skjutfält, east of Sköldvägen/Kanonvägen	SE, Up, Älvkarleby kommun, Älvkarleby socken, Marma skjutfält, east of Sköldvägen/Kanonvägen	60.524267	17.451483	10 m	boreonemoral	Malaise trap, Townes model	Dry meadow with birch in shooting range	Open meagre dry habitat	167°	29	Achillea millefolium, Antennaria dioica, Betula pendula, Equisetum hyemale, Erigeron acer, Fragaria vesca, Galium boreale, Galium verum, Pteridium aquilinum, Ribes alpinum, Rubus saxatilis, Solidago virgaurea, Stellaria, Trifolium pratense, Vacciniuim vitis-idaea, Vicia sylvatica	2003-06-17	2006-05-07	26
7	Up Båtfors	Sweden	Uppland	Up	Älvkarleby kommun	Älvkarleby socken	Båtfors, between Milsten and Båtforstorpet	SE, Up, Älvkarleby kommun, Älvkarleby socken, Båtfors, between Milsten and Båtforstorpet	60.460650	17.317817	10 m	boreonemoral	Malaise trap, Townes model	Flood-regiment old-growth birch edge of pine forest	Forest: coniferous forest	290°	40	Betula pendula, Convallaria majalis, Dactylorhiza maculata maculata, Fraxinus excelsior, Iris pseudacorus, Mycelis muralis, Pinus sylvestris, Polygonum aviculare, Populus tremula, Potentilla sp., Quercus robur, Salix caprea, Sorbus aucuparia, Stellaria sp., Vaccinium myrtillus	2003-06-17	2006-04-18	32
8	Up Biskops-Arnö	Sweden	Uppland	Up	Håbo kommun	Övergran socken	Biskops-Arnö, northern beach	SE, Up, Håbo kommun, Övergran socken, Biskops-Arnö, northern beach	59.672133	17.500850	10 m	boreonemoral	Malaise trap, Townes model	Elm grove	Forest: nemoral deciduous forest	185°	8	Actaea spicata, Alnus glutinosa, Anthriscus sylvestris, Convallaria majalis, Fraxinus excelsior, Geranium sylvaticum, Geum urbanum, Iris pseudacorus, Paris quadrifolia, Poa nemoralis, Rubus idaeus, Stachys sylvatica, Taraxacum sp., Ulmus glabra	2003-06-18	2006-04-05	23
9	Up Rickebasta	Sweden	Uppland	Up	Knivsta kommun	Alsike socken	Rickebasta alsumpskog, western part	SE, Up, Knivsta kommun, Alsike socken, Rickebasta alsumpskog, western part	59.734350	17.720417	10 m	boreonemoral	Malaise trap, Townes model	Alder swamp forest	Forest: boreal deciduous forest	211°	20	Alnus glutinosa, Betula pubescens, Carex spp., Cirsium palustre, Fraxinus excelsior, Galium sp., Iris pseudacorus, Juncus sp., Lemna sp., Lycopus europaeus, Lysimachia thyrsiflora, Peucedanum palustre, Picea abies, Prunus padus, Ranunculus acris, Solanum dulcamara, Stellaria longifolia	2003-06-18	2005-12-08	36
10	Dr Säterdalen Näsåkerspussen	Sweden	Dalarna	Dr	Säters kommun	Säter socken	Säterdalen, Näsåkerspussen	SE, Dr, Säters kommun, Säter socken, Säterdalen, Näsåkerspussen	60.366667	15.716667	10 m	boreal	Malaise trap, Townes model	Alder forest in slope of large silt ravine	Forest: nemoral deciduous forest	165°	162	Alnus incana, Anemone nemorosa, Betula pendula, Butomus umbellatus, Equisetum fluviatile, Oxalis acetosella, Paris quadrifolia, Prunus padus, Pteridium aquilinum, Ribes spicatum spicatum, Rubus idaeus, Sambucus racemosa, Sorbus aucuparia	2003-06-23	2006-05-11	33
11	Vs Västerfärnebo Nötmyran	Sweden	Västmanland	Vs	Sala kommun	Västerfärnebo socken	Nötmyran, Östermyran near Islingby	SE, Vs, Sala kommun, Västerfärnebo socken, Nötmyran, Östermyran near Islingby	59.941959	16.309450	10 m	boreal	Malaise trap, Townes model	Moist hay-making meadow	Open lush habitat	230°	66	Agrostis canina, Alchemilla, Alopecurus pratensis, Anthriscus sylvestris, Betula pendula, Campanula patula, Carex nigra, Cirsium arvense, Comarum palustre, Eriophorum angustifolium, Filipendula ulmaria, Galeopsis speciosa, Lathyrus pratensis, Luzula multiflora, Lychnis flos-cuculi, Potentilla anserina, Ranunculus acris, Rhinanthus minor, Rumex acetosa, Senecio viscosus, Thalictrum flavum, Trifoli…	2003-06-23	2005-10-17	25
12	Sö Hunga södergård	Sweden	Södermanland	Sö	Trosa kommun	Vagnhärad socken	Hunga, Hunga Södergård 1	SE, Sö, Trosa kommun, Vagnhärad socken, Hunga, Hunga Södergård 1	58.920733	17.521233	10 m	boreonemoral	Malaise trap, Townes model	Agricultural backyard, heavily eutrophicated, in tall grass near stable manure pile	Open lush habitat	180°	18	Agrostis gigantea, Lolium perenne, Rumex longifolius, Salix caprea, Tripleurospermum perforatum, Urtica dioica	2003-06-24	2005-01-05	25
13	Ög Omberg Stocklycke äng	Sweden	Östergötland	Ög	Ödeshögs kommun	Västra Tollstad socken	Omberg, Stocklycke äng	SE, Ög, Ödeshögs kommun, Västra Tollstad socken, Omberg, Stocklycke äng	58.307533	14.630983	10 m	boreonemoral	Malaise trap, Townes model	Meadow in lime-tree dominated forest	Open lush habitat	180°	130	Aegopodium podagraria, Aquilegia vulgaris, Betula pendula, Cirsium palustre, Corylus avellana, Dactylis glomerata, Dactylorhiza maculata maculata, Fagus sylvatica, Filipendula ulmaria, Fraxinus excelsior, Geum rivale, Laserpitium latifolium, Prunus padus, Ulmus glabra	2003-06-24	2005-09-16	30
14	Ög Omberg Stocklycke skog	Sweden	Östergötland	Ög	Ödeshögs kommun	Västra Tollstad socken	Omberg, Stocklycke skog	SE, Ög, Ödeshögs kommun, Västra Tollstad socken, Omberg, Stocklycke skog	58.306383	14.631833	10 m	boreonemoral	Malaise trap, Townes model	Mixed elm-dominated forest	Forest: nemoral deciduous forest	200°	136	Aegopodium podagraria, Anemone hepatica, Anemone nemorosa, Corylus avellana, Fraxinus excelsior, Paris quadrifolia, Polygonatum multiflorum, Prunus padus, Ribes alpinum, Stachys sylvatica, Ulmus glabra	2003-06-24	2006-04-24	29
15	Ög Omberg Storpissan	Sweden	Östergötland	Ög	Ödeshögs kommun	Västra Tollstad socken	Omberg, Storpissan NR	SE, Ög, Ödeshögs kommun, Västra Tollstad socken, Omberg, Storpissan NR	58.334917	14.655000	10 m	boreonemoral	Malaise trap, Townes model	Old-growth spruce forest	Forest: coniferous forest	250°	172	Allium ursinum, Alnus glutinosa, Fraxinus excelsior, Hylocomium splendens, Mercurialis perennis, Oxalis acetosella, Picea abies, Ribes alpinum, Sorbus aucuparia	2003-06-24	2006-04-24	26
16	Ög Omberg Bokskogsreservatet	Sweden	Östergötland	Ög	Ödeshögs kommun	Västra Tollstad socken	Omberg, Bokskogsreservatet	SE, Ög, Ödeshögs kommun, Västra Tollstad socken, Omberg, Bokskogsreservatet	58.297183	14.634817	10 m	boreonemoral	Malaise trap, Townes model	Beech forest	Forest: nemoral deciduous forest	210°	108	Anemone hepatica, Anemone nemorosa, Aquilegia vulgaris, Carex, Fagus sylvatica, Fraxinus excelsior, Larix decidua, Maianthemum bifolium	2003-06-24	2006-04-24	24
17	Sm Lönnemålen	Sweden	Småland	Sm	Gränna kommun	Gränna socken	Lönnemålen	SE, Sm, Gränna kommun, Gränna socken, Lönnemålen	58.048917	14.573033	10 m	boreonemoral	Malaise trap, Townes model	Spruce forest with big ash pollards	Forest: nemoral deciduous forest	198°	293	Aegopodium podagraria, Anthriscus sylvestris, Corylus avellana, Dactylis glomerata, Filipendula ulmaria, Fraxinus excelsior, Geranium sylvaticum, Oxalis acetosella, Picea abies, Ranunculus acris, Urtica dioica	2003-06-24	2006-05-10	37
18	Sm Hornsö kronopark	Sweden	Småland	Sm	Högsby kommun	Långemåla socken	Hornsö kronopark, vicinity of Skärsgölorna, near end of Nya Kringlavägen	SE, Sm, Högsby kommun, Långemåla socken, Hornsö kronopark, vicinity of Skärsgölorna, near end of Nya Kringlavägen	57.006550	16.109350	10 m	boreonemoral	Malaise trap, Townes model	Birch fen	Forest: boreal deciduous forest	170°	81	Alnus glutinosa, Betula pubescens, Comarum palustre, Picea abies, Pinus sylvestris, Quercus robur, Salix sp., Sphagnum spp., Vacciniuim vitis-idaea, Vaccinium myrtillus	2003-06-25	2005-04-19	48
20	Öl Frösslunda alvar	Sweden	Öland	Öl	Mörbylånga kommun	Stenåsa socken	Frösslunda alvar, north-eastern part	SE, Öl, Mörbylånga kommun, Stenåsa socken, Frösslunda alvar, north-eastern part	56.547450	16.577250	10 m	nemoral	Malaise trap, Townes model	Cattle-grazed pasture on alvar limestone heath	Open meagre dry habitat	104°	18	Anemone pratensis, Filipendula vulgaris, Galium boreale, Globularia vulgaris, Helianthemum nummularium, Helictotrichon pratense, Juniperus communis, Oenothera biennis, Prunus spinosa, Sedum acre, Thymus serpyllum serpyllum	2003-06-25	2005-12-30	24
21	Öl Ottenby Södra lunden	Sweden	Öland	Öl	Mörbylånga kommun	Ås socken	Ottenby NR, Södra lunden, radarstationen	SE, Öl, Mörbylånga kommun, Ås socken, Ottenby NR, Södra lunden, radarstationen	56.219350	16.422350	10 m	nemoral	Malaise trap, Townes model	Glade in deciduous grove	Forest: nemoral deciduous forest	257°	11	Alnus glutinosa, Betula pendula, Oxalis acetosella, Populus tremula, Quercus robur, Rubus, Rubus idaeus	2003-06-25	2005-12-31	28
22	Öl Gamla Skogsby	Sweden	Öland	Öl	Mörbylånga kommun	Torslunda socken	Skogsby, Gamla Skogsby near Kalkstad NR, Diversitetsängen	SE, Öl, Mörbylånga kommun, Torslunda socken, Skogsby, Gamla Skogsby near Kalkstad NR, Diversitetsängen	56.616700	16.507617	10 m	nemoral	Malaise trap, Townes model	Rich transitional meadow with shrubs near nemoral forest	Open lush habitat	153°	42	Allium sp., Convolvulus arvensis, Dactylis glomerata, Dasiphora fruticosa, Filipendula vulgaris, Fragaria vesca, Fraxinus excelsior, Galium boreale, Galium verum, Medicago sativa falcata, Poa pratensis pratensis, Primula veris, Prunus spinosa, Ranunculus polyanthemos, Rosa sp., Taraxacum sp., Vicia hirsuta	2003-06-25	2006-09-06	46
23	Bl Tromtö nabb	Sweden	Blekinge	Bl	Ronneby kommun	Förkärla socken	Tromtö NR, Tromtö nabb	SE, Bl, Ronneby kommun, Förkärla socken, Tromtö NR, Tromtö nabb	56.149067	15.480017	10 m	nemoral	Malaise trap, Townes model	Old-growth oak forest with beech	Forest: nemoral deciduous forest	100°	8	Anemone nemorosa, Cerastium, Dactylis glomerata, Fagus sylvatica, Galium aparine, Poa nemoralis, Quercus robur, Sorbus aucuparia, Stellaria holostea	2003-06-26	2005-12-28	59
24	Sm Stenbrohult Djäknabygd	Sweden	Småland	Sm	Älmhults kommun	Stenbrohult socken	Djäknabygds bokbacke	SE, Sm, Älmhults kommun, Stenbrohult socken, Djäknabygds bokbacke	56.609133	14.193050	10 m	boreonemoral	Malaise trap, Townes model	Old-growth beech grove	Forest: nemoral deciduous forest	40°	149	Anemone nemorosa, Betula pendula, Carpinus betulus, Corylus avellana, Deschampsia flexuosa, Fagus sylvatica, Galium saxatile, Holcus mollis, Juniperus communis, Lathyrus linifolius, Luzula pilosa, Maianthemum bifolium, Poa pratensis pratensis, Quercus robur, Sorbus aucuparia, Trientalis europaea, Vaccinium myrtillus	2003-06-26	2006-05-07	19
25	Up Fiby urskog	Sweden	Uppland	Up	Uppsala kommun	Vänge socken	Fiby urskog NR, Trefaldighets källa	SE, Up, Uppsala kommun, Vänge socken, Fiby urskog NR, Trefaldighets källa	59.883400	17.193050	10 m	boreonemoral	Malaise trap, Townes model	Mixed aspen forest on alluvial sediment	Forest: boreal deciduous forest	178°	63	Alnus glutinosa, Betula pendula, Filipendula ulmaria, Fraxinus excelsior, Iris pseudacorus, Lysimachia, Picea abies, Prunus padus, Rubus idaeus, Salix caprea, Solanum dulcamara, Urtica dioica, Viburnum opulus	2003-06-29	2003-11-18	5
26	Up Svartlöga	Sweden	Uppland	Up	Norrtälje kommun	Blidö socken	Svartlöga, Matkrok	SE, Up, Norrtälje kommun, Blidö socken, Svartlöga, Matkrok	59.569450	19.053000	10 m	boreonemoral	Malaise trap, Townes model	Lush archipelago-type deciduous forest	Forest: boreal deciduous forest	175°	10	Alnus glutinosa, Betula pendula, Carex, Dactylis glomerata, Juniperus communis, Melampyrum sylvaticum, Melica uniflora, Prunus padus, Rhamnus cathartica, Salix caprea, Sorbus aucuparia, Vaccinium myrtillus	2003-07-07	2006-03-23	31
27	Up Vällen Ekdalen	Sweden	Uppland	Up	Uppsala kommun	Knutby socken	Vällen, Ekdalen NR, southern hillside	SE, Up, Uppsala kommun, Knutby socken, Vällen, Ekdalen NR, southern hillside	59.971517	18.354983	10 m	boreonemoral	Malaise trap, Townes model	Herb-rich open oak forest	Forest: nemoral deciduous forest	40°	38	Anemone hepatica, Anemone nemorosa, Corylus avellana, Fragaria vesca, Lonicera xylosteum, Populus tremula, Quercus robur, Ribes alpinum, Rubus idaeus, Rubus saxatilis, Senecio viscosus, Sorbus aucuparia, Tilia cordata	2003-07-07	2006-05-11	56
28	Go Roleks	Sweden	Gotland	Go	Gotlands kommun	Vall socken	Roleks	SE, Go, Gotlands kommun, Vall socken, Roleks	57.536783	18.337883	10 m	boreonemoral	Malaise trap, Townes model	Open limestone pasture at border to pine forest	Open meagre dry habitat	276°	54	Bellis perennis, Crataegus, Dactylis glomerata, Festuca ovina, Filipendula vulgaris, Fraxinus excelsior, Galium verum, Helianthemum nummularium, Juniperus communis, Myosotis scorpioides scorpioides, Pinus sylvestris, Plantgo lanceolata, Rhamnus cathartica, Rosa, Sambucus racemosa, Ulmus minor	2003-07-08	2006-01-11	25
29	Go Rembs	Sweden	Gotland	Go	Gotlands kommun	Sundre socken	Rembs	SE, Go, Gotlands kommun, Sundre socken, Rembs	56.933393	18.268783	10 m	nemoral	Malaise trap, Townes model	Lichen-rich pine forest on sand dunes	Forest: coniferous forest	230°	12	Cladonia rangiferina, Cladonia stellaris, Juniperus communis, Pinus sylvestris, Pleurozium schreberi	2003-07-08	2005-12-12	26
30	Sö Tullgarnsnäs	Sweden	Södermanland	Sö	Södertälje kommun	Hölö socken	Tullgarnsnäs NR, Rävsalaviken	SE, Sö, Södertälje kommun, Hölö socken, Tullgarnsnäs NR, Rävsalaviken	58.955217	17.607550	10 m	boreonemoral	Malaise trap, Townes model	Spruce forest edge towards coastal pasture	Forest: coniferous forest	236°	12	Anemone nemorosa, Betula pendula, Campanula persicifolia, Convallaria majalis, Dactylis glomerata, Deschampsia cespitosa, Fraxinus excelsior, Juniperus communis, Melampyrum sylvaticum, Picea abies, Poa sp., Primula veris, Prunus spinosa, Quercus robur, Rosa sp., Sorbus aucuparia, Ulmus glabra	2003-07-09	2006-05-21	16
31	Bo Ödsmål Kolhättan	Sweden	Bohuslän	Bo	Stenungsunds kommun	Ödsmål socken	Kolhättan, Hällsberget	SE, Bo, Stenungsunds kommun, Ödsmål socken, Kolhättan, Hällsberget	58.140933	11.856200	10 m	nemoral	Malaise trap, Townes model	Deciduous forest in rocky slope	Forest: nemoral deciduous forest	164°	75	Betula pendula, Deschampsia flexuosa, Melica nutans, Oxalis acetosella, Picea abies, Poa annua, Populus tremula, Pteridium aquilinum, Quercus robur, Rubus idaeus, Sorbus aucuparia, Tilia cordata, Viola sp	2003-07-10	2006-05-08	41
32	Bo Stora Snixholmen	Sweden	Bohuslän	Bo	Tanums kommun	Kville socken	Hamburgsund, Stora Snixholmen	SE, Bo, Tanums kommun, Kville socken, Hamburgsund, Stora Snixholmen	58.564417	11.251733	10 m	boreonemoral	Malaise trap, Townes model	Crevice in open coastal granite rock	Open meagre damp habitat	238°	5	Achillea millefolium, Calluna vulgaris, Calystegia sepium, Cirsium palustre, Eleocharis palustris, Euphorbia palustris, Galium aparine, Galium verum, Hypericum perforatum, Linaria vulgaris, Salix hastata, Sedum acre, Sedum telephium, Silene uniflora, Sorbus aucuparia, Sorbus intermedia, Ulmus glabra	2003-07-12	2006-05-05	42
33	Ha Särö Västerskog	Sweden	Halland	Ha	Kungsbacka kommun	Släp socken	Särö Västerskog, mid-northern part	SE, Ha, Kungsbacka kommun, Släp socken, Särö Västerskog, mid-northern part	57.505200	11.925733	10 m	nemoral	Malaise trap, Townes model	Oak forest with pines	Forest: nemoral deciduous forest	112°	24	Deschampsia flexuosa, Juniperus communis, Lonicera caprifolium, Pinus sylvestris, Polypodium vulgare, Quercus robur, Sorbus aucuparia, Taxus baccata, Vaccinium myrtillus	2003-07-10	2006-01-04	47
34	Ha Mästocka ljunghed	Sweden	Halland	Ha	Laholms kommun	Veinge socken	Mästocka, Mästocka ljunghed, northeastern edge	SE, Ha, Laholms kommun, Veinge socken, Mästocka, Mästocka ljunghed, northeastern edge	56.613850	13.233767	10 m	nemoral	Malaise trap, Townes model	Calluna heath with atlantic climatic influence	Open meagre dry habitat	188°	136	Andromeda polifolia, Betula pubescens, Calluna vulgaris, Empetrum nigrum, Eriophorum angustifolium, Myrica gale, Pinus sylvestris	2003-07-05	2004-09-24	16
35	Ha Gårdshult Buskastycket	Sweden	Halland	Ha	Halmstad kommun	Tönnersjö socken	Gårdshult NR, Buskastycket	SE, Ha, Halmstad kommun, Tönnersjö socken, Gårdshult NR, Buskastycket	56.694883	13.150500	10 m	nemoral	Malaise trap, Townes model	Moist hay-making meadow in deciduous forest	Open lush habitat	226°	148	Betula pubescens, Calluna vulgaris, Carex echinata, Carex nigra, Deschampsia flexuosa, Eriophorum angustifolium, Juncus conglomeratus, Maianthemum bifolium, Melampyrum pratense, Molinia caerulea, Polytrichum, Quercus robur, Sphagnum, Trichophorum cespitosum germanicum, Vaccinium myrtillus	2003-07-11	2005-11-04	39
36	Sk Skäralid steep	Sweden	Skåne	Sk	Klippans kommun	Riseberga socken	Söderåsen NP, Skäralid, Northern Lierna, mid-slope	SE, Sk, Klippans kommun, Riseberga socken, Söderåsen NP, Skäralid, Northern Lierna, mid-slope	56.026367	13.223033	10 m	nemoral	Malaise trap, Townes model	Beech forest in steep canyon slope	Forest: nemoral deciduous forest	240°	125	Deschampsia flexuosa beech forest, Deschampsia flexuosa, Fagus sylvatica, Viburnum sp.	2003-07-11	2006-05-07	22
37	Sk Skäralid valley	Sweden	Skåne	Sk	Klippans kommun	Riseberga socken	Söderåsen NP, Skäralid, valley below northern Lierna	SE, Sk, Klippans kommun, Riseberga socken, Söderåsen NP, Skäralid, valley below northern Lierna	56.027217	13.223433	10 m	nemoral	Malaise trap, Townes model	Rich beech forest at canyon bottom	Forest: nemoral deciduous forest	DATA MISSING ON WEBPAGE	108	Alnus glutinosa, Betula pendula, Fagus sylvatica, Fraxinus excelsior, Rubus idaeus, Sorbus aucuparia	2003-07-11	2006-05-07	22
38	Sk Drakamöllan	Sweden	Skåne	Sk	Tomelilla kommun	Maglehem socken	Drakamöllan, border between pasture 1 and 2	SE, Sk, Tomelilla kommun, Maglehem socken, Drakamöllan, border between pasture 1 and 2	55.761767	14.117800	10 m	nemoral	Malaise trap, Townes model	"Sandstäpp": Koeleria xeric sand calcareous grassland	Open meagre dry habitat	250°	84	Agrostis capillaris heath, Agrostis capillaris, Armeria maritima, Calluna vulgaris, Corynephorus canescens, Deschampsia flexuosa, Galium verum, Helichrysum arenarium, Juniperus communis, Sedum acre, Thymus serpyllum serpyllum	2003-07-11	2006-02-02	84
39	Sk Stenshuvud hill	Sweden	Skåne	Sk	Simrishamns kommun	Södra Mellby socken	Stenshuvud NP, Stenshuvud hill, above Krivarboden	SE, Sk, Simrishamns kommun, Södra Mellby socken, Stenshuvud NP, Stenshuvud hill, above Krivarboden	55.660300	14.275533	10 m	nemoral	Malaise trap, Townes model	Lush mixed oak forest	Forest: nemoral deciduous forest	230°	29	Acer pseudoplatanus, Carpinus betulus, Corylus avellana, Cotoneaster niger, Festuca ovina, Fraxinus excelsior, Lonicera caprifolium, Malus domestica, Melica uniflora, Polypodium vulgare, Quercus robur, Rosa, Rubus, Stellaria holostea, Tilia cordata	2003-07-12	2006-01-13	35
40	Sk Stenshuvud Svabesholmsskog	Sweden	Skåne	Sk	Simrishamns kommun	Södra Mellby socken	Stenshuvud NP, northern Svabesholmsskog	SE, Sk, Simrishamns kommun, Södra Mellby socken, Stenshuvud NP, northern Svabesholmsskog	55.661383	14.268733	10 m	nemoral	Malaise trap, Townes model	Hornbeam forest	Forest: nemoral deciduous forest	173°	45	Anemone nemorosa, Cardamine bulbifera, Carpinus betulus, Fagus sylvatica, Glechoma hederacea, Oxalis acetosella, Stellaria nemorum, Viola riviniana	2003-07-12	2006-01-16	36
41	Sm Store mosse	Sweden	Småland	Sm	Gnosjö kommun	Kävsjö socken	Store mosse NP, Kittlakull	SE, Sm, Gnosjö kommun, Kävsjö socken, Store mosse NP, Kittlakull	57.287233	13.919133	10 m	boreonemoral	Malaise trap, Townes model	Sphagnum bog	Open meagre damp habitat	DATA MISSING ON WEBPAGE	167	Andromeda polifolia, Betula pubescens, Calluna vulgaris, Empetrum nigrum, Eriophorum angustifolium, Pinus sylvestris, Sphagnum spp.	2003-07-12	2006-02-07	43
42	Hr Sånfjället	Sweden	Härjedalen	Hr	Härejdalens kommun	Hede socken	Sonfjället NP, Sånfjället, Nyvallens fäbod	SE, Hr, Härejdalens kommun, Hede socken, Sonfjället NP, Sånfjället, Nyvallens fäbod	62.316683	13.568555	10 m	alpine	Malaise trap, Townes model	Alpine downy birch forest with spruce on mountain side	Forest: boreal deciduous forest	150°	733	Betula pubescens, Epilobium angustifolium, Geranium sylvaticum, (Lycopodiaceae), Melampyrum sylvaticum, Nardus stricta, Picea abies, Solidago virgaurea, Sorbus aucuparia, Vaccinium myrtillus	2003-07-16	2005-04-20	10
43	Hs Bjuråker Stensjön	Sweden	Hälsingland	Hs	Hudiksvalls kommun	Bjuråker socken	Stensjön-Lomtjärn NR, Stensjön	SE, Hs, Hudiksvalls kommun, Bjuråker socken, Stensjön-Lomtjärn NR, Stensjön	62.140333	16.286100	10 m	boreal	Malaise trap, Townes model	Moist pine forest near Sphagnum bog	Forest: coniferous forest	185°	359	Betula pubescens, Calluna vulgaris, Empetrum nigrum, Goodyera repens, Myrica gale, Picea abies, Pinus sylvestris, Rubus chamaemorus, Salix, Sphagnum, Vaccinium myrtillus	2003-07-17	2006-05-02	53
44	Ån Skuleskogen	Sweden	Ångermanland	Ån	Örnsköldsviks kommun	Vibyggerå socken	Skuleskogen NP, Långrå	SE, Ån, Örnsköldsviks kommun, Vibyggerå socken, Skuleskogen NP, Långrå	63.088717	18.498383	10 m	boreal	Malaise trap, Townes model	Rocky brook ravine in old-growth spruce-aspen forest	Forest: coniferous forest	252°	28	Alnus glutinosa, Anemone hepatica, Betula pendula, Convallaria majalis, Dryopteris filixmas, Equisetum sylvaticum, Maianthemum bifolium, Picea abies, Rubus saxatilis, Sorbus aucuparia, Vaccinium myrtillus	2003-07-17	2006-07-05	21
45	Vb Holmön	Sweden	Västerbotten	Vb	Umeå kommun	Holmön socken	Holmön, east of Bärmyran	SE, Vb, Umeå kommun, Holmön socken, Holmön, east of Bärmyran	63.789650	20.848683	10 m	boreal	Malaise trap, Townes model	Blueberry spruce forest next to pasture	Forest: coniferous forest	312°	8	Achillea millefolium, Calluna vulgaris, Carex nigra, Galium uliginosum, Juniperus communis, Leontodon autumnalis, Linnaea borealis, Maianthemum bifolium, Picea abies, Populus tremula, Ranunculus acris, Sorbus aucuparia, Taraxacum sp., Trifolium repens, Vacciniuim vitis-idaea, Vaccinium myrtillus	2003-07-18	2006-07-05	40
46	Vb Ammarnäs	Sweden	Lycksele lappmark	Ly	Sorsele kommun	Sorsele socken	Vindelfjällen NR, Ammarnäs, Tjulträsk, Laspen	SE, Ly, Sorsele kommun, Sorsele socken, Vindelfjällen NR, Ammarnäs, Tjulträsk, Laspen	65.966783	16.060500	10 m	alpine	Malaise trap, Townes model	Alpine downy birch forest	Forest: boreal deciduous forest	210°	598	Aconitum lycoctonum lycoctonum, Betula pubescens, Carex sp., Cicerbita alpina, Cornus suecica, Equisetum sylvaticum, Euphrasia stricta brevipila, Gymnocarpium dryopteris, Juniperus communis, Melampyrum sylvaticum, Potentilla argentea, Salix sp., Solidago virgaurea, Sphagnum spp., Vacciniuim vitis-idaea, Vaccinium myrtillus	2003-07-19	2006-01-02	26
47	Lu Muddus	Sweden	Lule lappmark	Lu	Jokkmokks kommun	Jokkmokk socken	Muddus NP, southern parking	SE, Lu, Jokkmokks kommun, Jokkmokk socken, Muddus NP, southern parking	66.769533	20.111383	10 m	boreal	Malaise trap, Townes model	Old-growth blueberry spruce forest	Forest: coniferous forest	180°	213	Betula pubescens, Empetrum nigrum, Equisetum sylvaticum, Picea abies, Populus tremula, Rhododendron tomentosum, Salix caprea, Vaccinium myrtillus, Vaccinium uliginosum	2003-07-20	2005-11-16	20
48	Lu Peltovaara	Sweden	Lule lappmark	Lu	Gällivare kommun	Gällivare socken	Ätnarova försökspark, Peltovaara	SE, Lu, Gällivare kommun, Gällivare socken, Ätnarova försökspark, Peltovaara	67.051717	20.385900	10 m	boreal	Malaise trap, Townes model	Lingonberry pine forest	Forest: coniferous forest	128°	441	Betula pubescens, Cladonia arbuscula, Cladonia rangiferina, Empetrum nigrum, Picea abies, Pinus sylvestris, Salix caprea, Vacciniuim vitis-idaea, Vaccinium myrtillus, Vaccinium uliginosum	2003-07-20	2006-01-04	29
49	Nb Vasikkavuoma	Sweden	Norrbotten	Nb	Pajala kommun	Pajala socken	Vasikkavuoma NR, east of camp	SE, Nb, Pajala kommun, Pajala socken, Vasikkavuoma NR, east of camp	67.229633	23.186667	10 m	boreal	Malaise trap, Townes model	Northern Equisetum hay-making marsh	Open lush habitat	260°	169	Betula nana, Betula pubescens, Comarum palustre, Equisetum fluviatile, Menyanthes trifoliata, Pinus sylvestris, Rhododendron tomentosum, Salix sp., Sphagnum spp., Vaccinium uliginosum	2003-07-21	2004-12-31	12
50	To Abisko Njakajaure	Sweden	Torne lappmark	To	Kiruna kommun	Jukkasjärvi socken	Abisko NP, east of heath at Njakajaure trail	SE, To, Kiruna kommun, Jukkasjärvi socken, Abisko NP, east of heath at Njakajaure trail	68.353867	18.782150	10 m	alpine	Malaise trap, Townes model	Dry sparse alpine downy birch forest	Forest: boreal deciduous forest	198°	404	Betula pubescens czerepanovii, Cladonia sp., Empetrum nigrum, Salix sp., Vacciniuim vitis-idaea	2003-07-21	2005-09-07	31
51	Vb Brännberget	Sweden	Västerbotten	Vb	Skellefteå kommun	Skellefteå socken	Brännberget NR, close to northern info sign	SE, Vb, Skellefteå kommun, Skellefteå socken, Brännberget NR, close to northern info sign	64.912800	20.499733	10 m	boreal	Malaise trap, Townes model	Rich blueberry spruce forest on limestone	Forest: coniferous forest	222°	180	Alnus incana, Betula pendula, Calypso bulbosa, Convallaria majalis, Cypripedium calceolus, Epipogium aphyllum, Fragaria vesca, Geranium sylvaticum, Juniperus communis, Listera ovata, Maianthemum bifolium, Picea abies, Pinus sylvestris, Platanthera chlorantha, Rubus saxatilis, Solidago virgaurea, Sorbus aucuparia, Vacciniuim vitis-idaea, Vaccinium myrtillus	2003-07-23	2004-09-27	16
52	Vb Kulbäcksliden Gammelskogsreservatet	Sweden	Västerbotten	Vb	Vindelns kommun	Degerfors socken	Kulbäcksliden research park, Gammelskogsreservatet	SE, Vb, Vindelns kommun, Degerfors socken, Kulbäcksliden research park, Gammelskogsreservatet	64.185100	19.573367	10 m	boreal	Malaise trap, Townes model	Old-growth blueberry spruce forest	Forest: coniferous forest	140°	262	Deschampsia flexuosa, Dicranum scoparium, Gymnocarpium dryopteris, Hylocomium splendens, Linnaea borealis, Luzula pilosa, Lycopodium annotinum annotinum, Maianthemum bifolium, Oxalis acetosella, Picea abies, Pleurozium schreberi, Polytrichum commune, Populus tremula, Ptilium crista-castrensis, Sorbus aucuparia, Trientalis europaea, Vacciniuim vitis-idaea, Vaccinium myrtillus	2003-08-01	2004-10-15	16
53	Vb Kulbäcksliden Kronmyran	Sweden	Västerbotten	Vb	Vindelns kommun	Degerfors socken	Kulbäcksliden research park, Degerö stormyr NR, Kronmyran	SE, Vb, Vindelns kommun, Degerfors socken, Kulbäcksliden research park, Degerö stormyr NR, Kronmyran	64.181717	19.556150	10 m	boreal	Malaise trap, Townes model	Sphagnum bog	Open meagre damp habitat	170°	268	Andromeda polifolia, Carex spp., Drosera rotundifolia, Juncus sp., Rubus chamaemorus, Sphagnum spp., Vaccinium oxycoccus	2003-08-01	2004-10-15	14
54	Vb Kulbäcksliden Kulbäcken	Sweden	Västerbotten	Vb	Vindelns kommun	Degerfors socken	Kulbäcksliden research park, Kulbäcken meadow	SE, Vb, Vindelns kommun, Degerfors socken, Kulbäcksliden research park, Kulbäcken meadow	64.190217	19.605700	10 m	boreal	Malaise trap, Townes model	Birch forest edge towards open meadow on alluvial sediment	Forest: boreal deciduous forest	175°	155	Agrostis capillaris, Angelica sylvestris, Betula pubescens, Calamagrostis purpurea, Cirsiuim helenioides, Epilobium angustifolium, Equisetum pratense, Filipendula ulmaria, Galium boreale, Geranium sylvaticum, Melampyrum pratense, Melampyrum sylvaticum, Polytrichum commune, Stellaria graminea, Trientalis europaea, Viola sp.	2003-08-01	2004-10-15	13
55	Vb Kulbäcksliden Granliden	Sweden	Västerbotten	Vb	Vindelns kommun	Degerfors socken	Kulbäcksliden research park, Granliden	SE, Vb, Vindelns kommun, Degerfors socken, Kulbäcksliden research park, Granliden	64.192567	19.566950	10 m	boreal	Malaise trap, Townes model	Mature spruce forest	Forest: coniferous forest	180°	216	Agrostis capillaris, Cicerbita alpina, Deschampsia flexuosa, Gymnocarpium dryopteris, Hylocomium splendens, Linnaea borealis, Lycopodium annotinum annotinum, Maianthemum bifolium, Oxalis acetosella, Picea abies, Pleurozium schreberi, Polytrichum commune, Rubus saxatilis, Solidago virgaurea, Sorbus aucuparia, Sphagnum spp., Trientalis europaea, Vacciniuim vitis-idaea, Vaccinium myrtillus	2003-08-01	2004-10-15	15
56	Vb Kulbäcksliden clearcutting	Sweden	Västerbotten	Vb	Vindelns kommun	Degerfors socken	Kulbäcksliden research park, Gammnybränna S	SE, Vb, Vindelns kommun, Degerfors socken, Kulbäcksliden research park, Gammnybränna W	64.144800	19.588917	10 m	boreal	Malaise trap, Townes model	15 year old clearcutting with shrubs and scattered spruce and larch	Open meagre damp habitat	210°	289	Betula pendula, Deschampsia cespitosa, Deschampsia flexuosa, Epilobium angustifolium, Gymnocarpium dryopteris, Larix decidua, Linnaea borealis, Luzula pilosa, Lycopodium annotinum annotinum, Maianthemum bifolium, Melampyrum sylvaticum, Picea abies, Pleurozium schreberi, Polytrichum commune, Populus tremula, Rubus idaeus, Salix caprea, Trientalis europaea, Vacciniuim vitis-idaea, Vaccinium myrtill…	2003-08-01	2004-10-15	15
57	Vb Kulbäcksliden spruce plantation	Sweden	Västerbotten	Vb	Vindelns kommun	Degerfors socken	Kulbäcksliden research park, Gammnybränna W	SE, Vb, Vindelns kommun, Degerfors socken, Kulbäcksliden research park, Storliden	64.154500	19.593183	10 m	boreal	Malaise trap, Townes model	15 year old spruce plantation	Forest: coniferous forest	160°	293	Cladonia sp., Deschampsia cespitosa, Epilobium angustifolium, Hylocomium splendens, Maianthemum bifolium, Melampyrum sylvaticum, Picea abies, Pinus sylvestris, Pleurozium schreberi, Polytrichum commune, Solidago virgaurea, Trientalis europaea, Vacciniuim vitis-idaea, Vaccinium myrtillus	2003-08-01	2004-10-15	13
58	Vb Kulbäcksliden pine plantation	Sweden	Västerbotten	Vb	Vindelns kommun	Degerfors socken	Kulbäcksliden research park, Storliden	SE, Vb, Vindelns kommun, Degerfors socken, Kulbäcksliden research park, Storliden	64.176700	19.590267	10 m	boreal	Malaise trap, Townes model	40 year old pine plantation	Forest: coniferous forest	160°	264	Cladonia arbuscula, Cladonia rangiferina, Deschampsia cespitosa, Dicranum scoparium, Empetrum nigrum, Hylocomium splendens, Linnaea borealis, Luzula pilosa, Lycopodium complanatum, Melampyrum sylvaticum, Pinus sylvestris, Pleurozium schreberi, Polytrichum commune, Ptilium crista-castrensis, Trientalis europaea, Vacciniuim vitis-idaea, Vaccinium myrtillus	2003-08-01	2004-10-15	15
59	Vb Kulbäcksliden bog edge	Sweden	Västerbotten	Vb	Vindelns kommun	Degerfors socken	Kulbäcksliden research park, Degerö stormyr	SE, Vb, Vindelns kommun, Degerfors socken, Kulbäcksliden research park, Degerö stormyr	64.181650	19.559133	10 m	boreal	Malaise trap, Townes model	Pine forest at Sphagnum bog edge	Forest: coniferous forest	160°	269	Betula nana, Betula pubescens, Empetrum nigrum, Eriophorum vaginatum, Pinus sylvestris, Pleurozium schreberi, Rubus chamaemorus, Sphagnum spp., Vacciniuim vitis-idaea, Vaccinium myrtillus, Vaccinium oxycoccus, Vaccinium uliginosum	2003-08-01	2004-10-15	14
60	Vb Kulbäcksliden unthinned	Sweden	Västerbotten	Vb	Vindelns kommun	Degerfors socken	Kulbäcksliden research park, Storliden	SE, Vb, Vindelns kommun, Degerfors socken, Kulbäcksliden research park, Storliden	64.178600	19.586533	10 m	boreal	Malaise trap, Townes model	Dense 25 year old mixed coniferous forest	Forest: coniferous forest	160°	260	Deschampsia cespitosa, Deschampsia flexuosa, Epilobium angustifolium, Gymnocarpium dryopteris, Hylocomium splendens, Linnaea borealis, Luzula pilosa, Maianthemum bifolium, Picea abies, Pinus sylvestris, Pleurozium schreberi, Polytrichum commune, Solidago virgaurea, Trientalis europaea, Vaccinium myrtillus	2003-08-01	2004-10-15	13
61	Vb Svartberget	Sweden	Västerbotten	Vb	Vindelns kommun	Degerfors socken	Svartberget research park, Åheden	SE, Vb, Vindelns kommun, Degerfors socken, Svartberget research park, Åheden	64.230517	19.785100	10 m	boreal	Malaise trap, Townes model	Lichen-rich pine forest	Forest: coniferous forest	180°	190	Calluna vulgaris, Cladonia sp., Cladonia arbuscula, Cladonia rangiferina, Cladonia stellaris, Dicranum scoparium, Hylocomium splendens, Pinus sylvestris, Pleurozium schreberi, Vacciniuim vitis-idaea, Vaccinium uliginosum	2003-08-01	2004-10-14	14
1000	Sm Bäckebo Grytsjön aspen	Sweden	Småland	Sm	Nybro kommun	Bäckebo socken	Grytsjön NR	SE, Sm, Nybro kommun, Bäckebo socken, Grytsjön NR	56.921656	16.101228	10 m	boreonemoral	Malaise trap, Townes model	Old-growth aspen forest in boulder terrain	Forest: boreal deciduous forest	40°	82	Betula pendula, Fragaria vesca, Quercus robur, Rubus idaeus, Picea abies, Pinus sylvestris, Populus tremula, Vaccinium myrtillus, Vaccinium vitis-idaea	2005-04-04	2006-06-15	19
1001	Sm Bäckebo Grytsjön meadow	Sweden	Småland	Sm	Nybro kommun	Bäckebo socken	Grytsjön NR	SE, Sm, Nybro kommun, Bäckebo socken, Grytsjön NR	56.931407	16.085536	10 m	boreonemoral	Malaise trap, Townes model	Moist hay-making meadow at birch-spruce forest edge	Open lush habitat	200°	81	Betula pendula, Cirsium ravens, Filipendula ulmaria, Fragaria vesca, Picea abies, Pinus sylvestris, Poaceae spp., Populus tremula, Quercus robur, Rubus idaeus, Salix spp.	2005-04-04	2006-06-15	20
1002	Vr Rudstorp	Sweden	Värmland	Vr	Munkfors kommun	Ransäter socken	Rudstorp	SE, Vr, Munkfors kommun, Ransäter socken, Rudstorp	59.772956	13.473714	10 m	boreal	Malaise trap, Townes model	Sandy railway bank through pasture land	Open meagre dry habitat	310°	84	Betula pendula, Poaceae spp.	2005-03-05	2006-05-07	18
1003	Vr Ransberg herrgård	Sweden	Värmland	Vr	Munkfors kommun	Ransäter socken	Ransäter, Ransberg Herrgård	SE, Vr, Munkfors kommun, Ransäter socken, Ransäter, Ransberg Herrgård	59.790442	13.415169	10 m	boreal	Malaise trap, Townes model	Old-growth mixed deciduous forest in stream ravine	Forest: nemoral deciduous forest	30°	115	Acer platanoides, Angelica sylvestris, Convallaria majalis, Fragaria viridis, Fraxinus excelsior, Hieracium umbellatum, Lathyrus linifolius, Lathyrus pratensis, Picea abies, Plantago major, Populus tremula, Prunus padus, Ranunculus acris, Rubus idaeus, Rubus saxatilis, Sorbus aucuparia, Taraxacum spp., Trifolium pratense, Tussilago farfara	2005-03-04	2006-05-06	13
1004	Sk Kullaberg	Sweden	Skåne	Sk	Höganäs kommun	Brunnby socken	Kullaberg NR, between Hjortstugan and Ransvik	SE, Sk, Höganäs kommun, Brunnby socken, Kullaberg NR, between Hjortstugan and Ransvik	56.291622	12.482483	10 m	nemoral	Malaise trap, Townes model	Oak forest in southern slope	Forest: nemoral deciduous forest	300°	75	Allium ursinum, Anemone nemoros, Calluna vulgaris, Deschampsia flexuosa, Galium odoratum, Hepatica nobilis, Lamiastrum galeobdolon, Melampyrum pratense,Mercurialis perennis, Quercus robur, Stellaria nemorum	2005-01-20	2006-05-04	8
1005	Sk Sandhammaren beach	Sweden	Skåne	Sk	Ystad kommun	Löderup socken	Sandhammaren, Järahusen	SE, Sk, Ystad kommun, Löderup socken, Sandhammaren, Järahusen	55.398072	14.209383	10 m	nemoral	Malaise trap, Townes model	Coastal sand dunes at dry oak forest edge	Open meagre dry habitat	180°	3	Ammophila arenaria, Betula pendula, Leymus arenarius, Pinus sylvestris	2005-01-19	2006-02-10	6
1006	Sk Sandhammaren forest	Sweden	Skåne	Sk	Ystad kommun	Löderup socken	Sandhammaren, Järahusen	SE, Sk, Ystad kommun, Löderup socken, Sandhammaren, Järahusen	55.403781	14.199936	10 m	nemoral	Malaise trap, Townes model	Oak forest on coastal sand dunes	Forest: nemoral deciduous forest	180°	11	Calluna vulgaris, Convallaria majalis, Pinus sylvestris, Poaceae spp., Quercus robur	2005-01-19	2005-09-26	6
1007	To Abisko Nuolja	Sweden	Torne lappmark	To	Kiruna kommun	Jukkasjärvi socken	Abisko NP, Nuolja, eastern slope	SE, To, Kiruna kommun, Jukkasjärvi socken, Abisko NP, Nuolja, eastern slope	68.359492	18.719197	10 m	alpine	Malaise trap, Townes model	Alpine heath above tree line	Open meagre damp habitat	300°	909	Antennaria porsildii, Carex rupestris, Draba daurica, Epilobium anagallidifolium, Juncus biglumis, Phippsia algida, Sagina caespitosa, Sagina nivalis, Salix sp., Saxifraga tenuis	2005-07-01	2006-07-15	11
1008	Sm Alsterån	Sweden	Småland	Sm	Nybro kommun	Kråkmåla socken	Alsterbro, Alsterån	SE, Sm, Nybro kommun, Kråkmåla socken, Alsterbro, Alsterån	56.936536	15.920167	10 m	boreonemoral	Malaise trap, Townes model	Moist alder forest on alluvial sediment near spruce forest	Forest: boreal deciduous forest	130°	108	Alnus glutinosa, Betula pubescens, Fraxinus excelsior, Picea abies, Poaceae spp., Quercus robur, Salix sp., Sphagnum spp.	2005-04-20	2006-10-13	50
1353	Lu Bombmurkleskogen	Sweden	Lule lappmark	Lu	Jokkmokks kommun	Jokkmokk socken	Messaure, Bombmurkleskogen NR	SE, Lu, Jokkmokks kommun, Jokkmokk socken, Messaure, Bombmurkleskogen NR	66.652060	20.381600	10 m	boreal	Malaise trap, Townes model	Herb-rich spruce forest near river	Forest: coniferous forest	DATA MISSING	105	-	2005-07-07	2005-10-28	7
2003	Sö Sofielundstippen cadaver dump	Sweden	Södermanland	Sö	Huddinge kommun	Huddinge socken	Sofielunds återvinningsanläggning	SE, Sö, Huddinge kommun, Huddinge socken, Sofielunds återvinningsanläggning	59.173100	17.984750	10 m	boreonemoral	Malaise trap, Townes model	Pine forest at garbage dump with small roadkill dump	Forest: coniferous forest	DATA MISSING	85	-	2006-03-01	2006-11-23	9
2006	Öl Skogsby Station Linné	Sweden	Öland	Öl	Mörbylånga kommun	Torslunda socken	Skogsby, Station Linné	SE, Öl, Mörbylånga kommun, Torslunda socken, Skogsby, Station Linné	56.619000	16.497320	10 m	nemoral	Malaise trap, Townes model	Lawn in garden with sandy soil	Open lush habitat	270°	44	Anthyllis vulneraria, Anthriscus sylvestris, Juniperus communis, Luzula pilosa, Medicago lupulina, Medicago sativa, Poaceae spp., Primula veris, Prunus spinosa, Rumex acetosa, Senecio jacobaea, Succisa pratensis, Taraxacum spp., Trifolium pratense,	2007-04-11	2008-11-04	27
2046	Sm Påboda	Sweden	Småland	Sm	Torsås Kommun	Söderåkra socken	Påboda	SE, Sm, Torsås Kommun, Söderåkra socken, Påboda	56.434723	16.070844	10 m	boreonemoral	Malaise trap, Townes model	Lush garden with shrubs and herbs on sandy soil	Open lush habitat	170°	10	Acer platanoides, Betula spp., Catalpa bignoniodes, Crataegus sp., Fallopia sachalinensis, Fraxinus excelsior, Gunnera manicata, Liriodendron tulipifera, Malus domestica, Miscanthus sp., Platanus acerifolia, Prunus domestica, Prunus domestica ssp. insititia, Prunus duracina, Rheum spp., Robinia pseudoacacia, Salix x pendulina, Syringa vulgaris, Thuja occidentalis	2008-01-01	2009-01-01	15
																				TOTAL	1919
