# Supplementary material for: The data of the Swedish Malaise Trap Project, a countrywide inventory of Sweden's insect fauna
Source: Biodivers Data J. 2020 Oct 23;8:e56286. doi: 10.3897/BDJ.8.e56286 (PMC7599202; doi:10.3897/BDJ.8.e56286)
Supplement: Supplementary material 2 — Sampling events [file bdj-08-e56286-s002.xlsx]

## Sheet: Worksheet
EventID	TrapID	StartDate	EndDate	Sampling period (days)
64	5	2003-06-16	2003-07-02	16
65	5	2003-07-02	2003-07-14	12
66	18	2003-06-25	2003-07-06	11
67	18	2003-07-06	2003-07-11	5
68	18	2003-07-11	2003-07-17	6
69	12	2003-06-24	2003-07-05	11
70	12	2003-07-05	2003-07-20	15
71	5	2003-07-14	2003-07-28	14
72	18	2003-07-17	2003-07-23	6
73	18	2003-07-23	2003-07-29	6
74	18	2003-07-29	2003-08-04	6
75	18	2003-08-04	2003-08-10	6
76	5	2003-07-28	2003-08-11	14
77	5	2003-08-11	2003-08-30	19
78	1	2003-06-08	2003-06-17	9
79	1	2003-06-17	2003-07-02	15
80	1	2003-07-02	2003-07-11	9
81	2	2003-06-08	2003-07-02	24
82	2	2003-07-02	2003-07-21	19
83	2	2003-07-21	2003-08-04	14
84	3	2003-06-08	2003-07-02	24
85	3	2003-07-02	2003-07-21	19
86	3	2003-07-21	2003-08-04	14
87	4	2003-06-08	2003-07-02	24
88	4	2003-07-02	2003-07-21	19
89	4	2003-07-21	2003-08-04	14
90	5	2003-08-30	2003-09-17	18
91	18	2003-08-10	2003-08-16	6
92	18	2003-08-16	2003-08-22	6
93	18	2003-08-22	2003-08-28	6
94	18	2003-08-28	2003-09-10	13
95	18	2003-09-10	2003-09-20	10
96	18	2003-09-20	2003-09-30	10
97	18	2003-09-30	2003-10-15	15
98	18	2003-10-15	2003-10-30	15
99	5	2003-09-17	2003-10-06	19
101	5	2003-10-06	2003-10-20	14
102	5	2003-10-20	2003-11-03	14
104	2	2003-08-04	2003-08-26	22
105	2	2003-08-26	2003-09-09	14
106	2	2003-09-09	2003-09-25	16
107	2	2003-09-25	2003-10-16	21
108	2	2003-10-16	2003-11-04	19
109	3	2003-08-04	2003-08-26	22
110	3	2003-08-26	2003-09-09	14
111	3	2003-09-09	2003-09-25	16
112	3	2003-09-25	2003-10-16	21
113	3	2003-10-16	2003-11-04	19
114	4	2003-08-04	2003-08-26	22
175	12	2003-07-20	2003-08-02	13
176	12	2003-08-02	2003-08-09	7
177	12	2003-08-09	2003-08-25	16
178	12	2003-08-25	2003-09-19	25
179	12	2003-09-19	2003-10-09	20
180	12	2003-10-09	2003-10-19	10
181	5	2003-11-03	2003-11-17	14
183	52	2003-08-01	2003-08-18	17
184	52	2003-08-18	2003-09-01	14
185	52	2003-09-01	2003-09-22	21
186	52	2003-09-22	2003-10-14	22
187	53	2003-08-01	2003-08-18	17
188	53	2003-08-18	2003-09-01	14
189	53	2003-09-01	2003-09-22	21
190	53	2003-09-22	2003-10-14	22
191	54	2003-08-01	2003-08-18	17
192	54	2003-08-18	2003-09-01	14
193	54	2003-09-01	2003-09-22	21
194	54	2003-09-22	2003-10-14	22
195	55	2003-08-01	2003-08-18	17
196	55	2003-08-18	2003-09-01	14
197	55	2003-09-01	2003-09-22	21
198	55	2003-09-22	2003-10-14	22
199	56	2003-08-01	2003-08-18	17
200	56	2003-08-18	2003-09-01	14
201	56	2003-09-01	2003-09-22	21
202	56	2003-09-22	2003-10-14	22
203	57	2003-08-01	2003-08-18	17
204	57	2003-08-18	2003-09-01	14
205	57	2003-09-01	2003-09-22	21
206	57	2003-09-22	2003-10-14	22
207	58	2003-08-01	2003-08-18	17
208	58	2003-08-18	2003-09-01	14
209	58	2003-09-01	2003-09-22	21
210	58	2003-09-22	2003-10-14	22
211	59	2003-08-01	2003-08-18	17
212	59	2003-08-18	2003-09-01	14
213	59	2003-09-01	2003-09-22	21
214	59	2003-09-22	2003-10-14	22
215	60	2003-08-01	2003-08-18	17
216	60	2003-08-18	2003-09-01	14
217	60	2003-09-01	2003-09-22	21
218	60	2003-09-22	2003-10-14	22
219	61	2003-08-01	2003-08-18	17
220	61	2003-08-18	2003-09-01	14
221	61	2003-09-01	2003-09-22	21
222	61	2003-09-22	2003-10-14	22
223	4	2003-08-26	2003-09-09	14
224	4	2003-09-09	2003-09-25	16
225	4	2003-09-25	2003-10-16	21
226	4	2003-10-16	2003-11-04	19
227	5	2003-11-17	2003-12-01	14
228	18	2003-10-30	2003-11-15	16
229	18	2003-11-15	2003-11-30	15
230	18	2003-11-30	2003-12-15	15
231	18	2003-12-15	2003-12-30	15
232	18	2003-12-30	2004-01-15	16
233	20	2003-06-25	2003-07-20	25
234	20	2003-07-20	2003-08-12	23
235	20	2003-08-12	2003-09-01	20
236	20	2003-09-01	2003-10-05	34
237	20	2003-10-05	2003-10-26	21
238	21	2003-06-25	2003-07-24	29
239	21	2003-07-24	2003-08-01	8
240	21	2003-08-01	2003-08-25	24
241	21	2003-08-25	2003-09-04	10
242	21	2003-09-04	2003-10-01	27
243	21	2003-10-01	2003-10-20	19
244	22	2003-06-25	2003-07-13	18
245	22	2003-07-13	2003-07-17	4
246	22	2003-07-17	2003-08-07	21
247	22	2003-08-07	2003-08-18	11
248	22	2003-08-18	2003-08-31	13
249	22	2003-08-31	2003-09-12	12
250	22	2003-09-12	2003-10-08	26
251	22	2003-10-08	2003-11-04	27
252	22	2003-11-04	2003-11-25	21
253	29	2003-07-08	2003-07-13	5
254	29	2003-07-13	2003-07-20	7
255	29	2003-07-20	2003-08-03	14
256	29	2003-08-03	2003-08-21	18
257	29	2003-08-21	2003-10-16	56
258	29	2003-10-16	2003-11-24	39
265	5	2003-12-01	2003-12-15	14
266	30	2003-07-09	2003-07-23	14
267	30	2003-08-01	2003-08-13	12
268	5	2003-12-15	2003-12-29	14
269	5	2003-12-29	2004-01-12	14
270	17	2003-06-24	2003-07-08	14
271	17	2003-07-08	2003-07-19	11
272	17	2003-07-19	2003-08-12	24
273	17	2003-08-12	2003-08-23	11
274	17	2003-08-23	2003-09-10	18
275	17	2003-09-10	2003-09-24	14
276	17	2003-09-24	2003-10-07	13
277	17	2003-10-07	2003-10-22	15
278	17	2003-10-22	2003-11-14	23
279	17	2003-11-14	2003-12-20	36
280	17	2003-12-20	2003-12-28	8
281	22	2003-11-25	2003-12-31	36
282	5	2004-01-12	2004-01-26	14
283	5	2004-01-26	2004-02-09	14
284	51	2003-07-23	2003-08-05	13
285	51	2003-08-05	2003-08-20	15
286	51	2003-08-20	2003-09-04	15
287	51	2003-09-04	2003-09-23	19
288	51	2003-09-23	2003-10-15	22
289	51	2003-10-15	2003-11-05	21
290	45	2003-07-18	2003-08-05	18
291	45	2003-08-05	2003-08-23	18
292	45	2003-08-23	2003-09-07	15
293	45	2003-09-07	2003-09-21	14
294	45	2003-09-21	2003-10-04	13
295	45	2003-10-04	2003-10-25	21
296	45	2003-10-25	2003-11-08	14
297	45	2003-11-08	2003-11-18	10
298	45	2003-11-18	2003-12-17	29
299	45	2003-12-17	2004-01-13	27
300	5	2004-02-09	2004-02-23	14
306	32	2003-07-12	2003-07-19	7
308	1	2003-07-11	2003-08-04	24
309	1	2003-08-04	2003-08-29	25
310	1	2003-08-29	2003-10-01	33
311	1	2003-10-01	2003-11-11	41
312	1	2003-11-11	2004-01-15	65
313	1	2004-01-15	2004-03-28	73
314	1	2004-03-28	2004-05-12	45
315	1	2004-05-12	2004-05-28	16
316	1	2004-05-28	2004-06-16	19
329	18	2004-01-15	2004-02-15	31
330	18	2004-02-15	2004-03-15	29
331	18	2004-03-15	2004-03-30	15
332	18	2004-03-30	2004-04-10	11
333	18	2004-04-10	2004-04-18	8
334	18	2004-04-18	2004-04-30	12
335	18	2004-04-30	2004-05-10	10
336	18	2004-05-10	2004-05-20	10
337	18	2004-05-20	2004-05-30	10
338	18	2004-05-30	2004-06-10	11
339	18	2004-06-10	2004-06-20	10
340	18	2004-06-20	2004-06-30	10
341	18	2004-06-30	2004-07-10	10
342	18	2004-07-10	2004-07-20	10
343	18	2004-07-20	2004-07-30	10
344	18	2004-07-30	2004-08-10	11
345	18	2004-08-10	2004-08-20	10
346	18	2004-08-20	2004-08-30	10
348	5	2004-02-23	2004-03-10	16
349	5	2004-03-10	2004/04/01	22
350	5	2004-04-01	2004-04-16	15
351	5	2004-04-16	2004-05-03	17
352	5	2004-05-03	2004-05-18	15
353	5	2004-05-18	2004-06-07	20
354	5	2004-06-07	2004-06-16	9
355	9	2003-06-18	2003-07-06	18
356	9	2003-07-06	2003-07-19	13
357	9	2003-07-19	2003-08-02	14
358	9	2003-08-13	2003-08-31	18
359	9	2003-08-31	2003-09-01	1
360	9	2003-09-01	2003-09-19	18
361	9	2003-09-19	2003-09-27	8
362	9	2003-09-27	2003-10-12	15
363	9	2003-10-12	2003-12-26	75
364	9	2003-12-26	2004-04-06	102
365	9	2004-04-06	2004-04-27	21
366	9	2004-04-27	2004-05-22	25
367	9	2004-05-22	2004-05-31	9
368	6	2003-06-17	2003-07-02	15
369	6	2003-07-02	2003-07-29	27
370	6	2003-07-29	2003-08-12	14
371	6	2003-08-12	2003-08-26	14
372	6	2003-08-26	2003-09-09	14
373	6	2003-09-09	2003-10-20	41
374	6	2003-10-20	2003-11-18	29
375	6	2003-11-18	2003-12-09	21
376	6	2003-12-09	2004-06-14	188
377	6	2004-06-14	2004-06-27	13
378	7	2003-06-17	2003-07-03	16
379	7	2003-07-03	2003-07-29	26
380	7	2003-07-29	2003-08-12	14
381	7	2003-08-12	2003-08-26	14
382	7	2003-08-26	2003-09-09	14
383	7	2003-09-09	2003-10-20	41
384	7	2003-10-20	2003-11-18	29
385	7	2003-11-18	2003-12-09	21
386	7	2003-12-09	2004-04-20	133
387	7	2004-04-20	2004-06-14	55
388	7	2004-06-14	2004-06-27	13
389	8	2003-06-18	2003-07-04	16
390	8	2003-07-04	2003-07-15	11
391	8	2003-07-15	2003-08-04	20
392	8	2003-08-04	2003-08-19	15
393	8	2003-08-19	2003-09-07	19
394	8	2004-04-19	2004-06-01	43
395	8	2004-06-01	2004-06-15	14
396	10	2003-06-23	2003-07-08	15
397	10	2003-07-08	2003-07-21	13
398	10	2003-07-21	2003-08-04	14
399	10	2003-08-04	2003-08-26	22
400	10	2003-08-26	2003-09-16	21
401	10	2003-09-16	2003-10-14	28
402	10	2003-10-14	2003-11-11	28
403	10	2003-11-11	2004-01-14	64
404	10	2004-01-14	2004-02-18	35
405	10	2004-02-18	2004-03-27	38
406	10	2004-03-27	2004-04-15	19
407	10	2004-04-15	2004-05-13	28
408	10	2004-05-13	2004-06-18	36
409	11	2003-06-23	2003-07-07	14
410	11	2003-07-07	2003-07-23	16
411	11	2003-07-23	2003-08-04	12
412	11	2003-08-04	2003-08-18	14
413	11	2003-08-18	2003-09-01	14
414	11	2003-09-01	2003-09-15	14
415	11	2003-09-15	2003-10-01	16
416	11	2003-10-01	2003-10-25	24
417	11	2003-10-25	2004-06-08	227
418	11	2004-06-08	2004-06-16	8
419	12	2003-10-19	2003-11-29	41
420	12	2003-11-29	2004-01-11	43
421	12	2004-01-11	2004-03-27	76
422	12	2004-03-27	2004-04-24	28
423	17	2003-12-28	2004-02-02	36
424	17	2004-02-02	2004-02-21	19
425	17	2004-02-21	2004-03-27	35
426	17	2004-03-27	2004-04-13	17
427	17	2004-04-13	2004-04-28	15
428	17	2004-04-28	2004-05-19	21
430	23	2003-06-26	2003-07-10	14
431	23	2003-07-10	2003-07-24	14
432	23	2003-07-24	2003-08-07	14
433	23	2003-08-07	2003-08-21	14
434	23	2003-08-21	2003-09-04	14
435	23	2003-09-04	2003-09-18	14
436	23	2003-09-18	2003-10-02	14
437	23	2003-10-02	2003-10-16	14
438	23	2003-10-16	2003-10-30	14
439	23	2003-10-30	2003-11-13	14
440	23	2003-11-13	2003-11-27	14
441	23	2003-11-27	2003-12-11	14
442	23	2003-12-11	2004-01-13	33
443	23	2004-01-13	2004-02-13	31
444	23	2004-02-13	2004-03-11	27
445	23	2004-03-11	2004-04-08	28
446	23	2004-04-08	2004-04-22	14
447	23	2004-04-22	2004-05-06	14
448	23	2004-05-06	2004-05-20	14
449	23	2004-05-20	2004-06-03	14
450	25	2003-06-29	2003-07-22	23
451	25	2003-07-22	2003-08-12	21
452	25	2003-08-12	2003-09-06	25
453	25	2003-09-06	2003-10-03	27
454	25	2003-10-03	2003-11-18	46
455	26	2003-07-07	2003-07-16	9
456	26	2003-07-16	2003-07-27	11
457	26	2003-07-27	2003-08-07	11
458	26	2003-08-07	2003-08-23	16
459	26	2003-08-23	2003-10-03	41
460	26	2003-10-03	2003-10-25	22
461	26	2003-10-25	2003-12-01	37
462	26	2003-12-01	2004-01-11	41
463	26	2004-01-11	2004-03-09	58
464	26	2004-03-09	2004-03-24	15
465	26	2004-03-24	2004-05-11	48
466	27	2003-07-07	2003-07-21	14
467	27	2003-07-21	2003-08-04	14
468	27	2003-08-04	2003-08-18	14
469	27	2003-08-18	2003-09-01	14
470	27	2003-09-01	2003-09-15	14
471	27	2003-09-15	2003-09-29	14
472	27	2003-09-29	2003-10-12	13
473	27	2003-10-12	2003-10-27	15
474	27	2003-10-27	2003-11-10	14
475	27	2003-11-10	2003-11-24	14
476	27	2003-11-24	2004-01-05	42
477	27	2004-01-05	2004-01-25	20
478	27	2004-01-25	2004-02-09	15
479	27	2004-02-09	2004-02-16	7
480	27	2004-02-16	2004-03-01	14
481	27	2004-03-01	2004-03-15	14
482	27	2004-03-15	2004-03-29	14
483	27	2004-03-29	2004-04-19	21
484	27	2004-04-19	2004-05-03	14
485	27	2004-05-03	2004-05-17	14
486	27	2004-05-17	2004-06-02	16
487	27	2004-06-02	2004-06-16	14
488	28	2003-07-08	2003-07-18	10
489	28	2003-07-18	2003-08-03	16
490	28	2003-08-03	2003-08-17	14
491	28	2003-08-17	2003-09-07	21
492	28	2003-09-07	2003-09-28	21
493	28	2003-09-28	2003-10-19	21
494	28	2003-10-19	2003-12-07	49
495	28	2003-12-07	2004-04-15	130
496	28	2004-04-15	2004-06-02	48
497	28	2004-06-02	2004-06-18	16
498	28	2004-06-18	2004-07-05	17
499	28	2004-07-05	2004-07-16	11
500	29	2003-11-24	2004-01-18	55
501	29	2004-01-18	2004-06-12	146
502	29	2004-06-12	2004-07-11	29
503	31	2003-07-10	2003-07-24	14
504	31	2003-07-24	2003-08-09	16
505	31	2003-08-09	2003-08-21	12
506	31	2003-08-21	2003-09-05	15
507	31	2003-09-05	2003-09-24	19
508	31	2003-09-24	2003-10-09	15
509	31	2003-10-09	2003-10-28	19
510	31	2003-10-28	2003-12-02	35
511	31	2003-12-02	2004-01-08	37
512	31	2004-01-08	2004-02-10	33
513	31	2004-02-10	2004-03-11	30
514	31	2004-03-11	2004-04-14	34
515	31	2004-04-14	2004-05-25	41
516	32	2003-07-19	2003-08-01	13
517	32	2003-08-01	2003-08-15	14
518	32	2003-08-15	2003-08-29	14
519	32	2003-08-29	2003-09-13	15
520	32	2003-09-13	2003-09-26	13
521	32	2003-09-26	2003-10-12	16
522	32	2003-10-12	2003-10-31	19
523	32	2003-10-31	2003-12-04	34
524	32	2003-12-04	2004-01-17	44
525	32	2004-01-17	2004-02-21	35
526	32	2004-02-21	2004-04-06	45
527	32	2004-04-06	2004-05-12	36
528	32	2004-05-12	2004-06-02	21
529	33	2003-07-10	2003-08-02	23
530	33	2003-08-02	2003-08-20	18
531	33	2003-08-20	2003-09-24	35
532	33	2003-09-24	2003-10-08	14
533	33	2003-10-08	2003-10-21	13
534	33	2003-10-21	2003-11-04	14
535	33	2003-11-04	2003-11-26	22
536	33	2003-11-26	2003-12-31	35
537	33	2003-12-31	2004-01-30	30
538	33	2004-01-30	2004-02-17	18
539	33	2004-02-17	2004-03-05	17
540	33	2004-03-05	2004-03-31	26
541	33	2004-03-31	2004-04-16	16
542	33	2004-04-16	2004-04-28	12
543	33	2004-04-28	2004-05-14	16
544	33	2004-05-14	2004-05-30	16
545	34	2003-07-10	2003-07-15	5
546	34	2003-07-15	2003-08-20	36
547	34	2003-08-20	2003-09-13	24
548	34	2003-09-13	2003-10-04	21
549	34	2003-10-04	2003-11-15	42
550	34	2003-11-15	2004-05-15	182
551	34	2004-05-15	2004-06-04	20
552	35	2003-07-11	2003-08-05	25
553	35	2003-08-05	2003-09-15	41
554	35	2003-09-15	2003-10-05	20
555	35	2003-10-05	2003-12-05	61
556	35	2003-12-05	2004-03-01	87
557	35	2004-03-01	2004-04-01	31
558	35	2004-04-01	2004-04-25	24
559	35	2004-04-25	2004-05-20	25
560	35	2004-05-20	2004-06-06	17
561	36	2003-07-25	2003-09-21	58
562	36	2003-09-21	2003-11-03	43
563	36	2003-11-03	2003-12-15	42
564	36	2003-12-15	2004-01-24	40
565	36	2004-01-24	2004-03-15	51
566	36	2004-03-15	2004-04-27	43
567	36	2004-04-27	2004-05-20	23
568	36	2004-05-20	2004-06-10	21
569	37	2003-07-11	2003-07-15	4
570	37	2003-07-15	2003-08-15	31
571	37	2003-08-15	2003-09-21	37
572	37	2003-09-21	2003-10-15	24
573	37	2003-10-15	2003-11-03	19
574	37	2003-11-03	2004-01-29	87
575	37	2004-01-29	2004-04-27	89
576	37	2004-04-27	2004-05-20	23
577	38	2003-07-11	2003-07-19	8
578	38	2003-07-19	2003-07-30	11
579	38	2003-07-30	2003-08-07	8
580	38	2003-08-07	2003-08-19	12
581	38	2003-08-19	2003-09-02	14
582	38	2003-09-02	2003-09-15	13
583	38	2003-09-15	2003-09-30	15
584	38	2003-09-30	2003-10-15	15
585	38	2003-10-15	2003-10-28	13
586	38	2003-10-28	2003-11-12	15
587	38	2003-11-12	2003-11-25	13
588	38	2003-11-25	2003-12-09	14
589	38	2003-12-09	2003-12-24	15
590	38	2003-12-24	2004-01-08	15
591	38	2004-01-08	2004-01-21	13
592	38	2004-01-21	2004-02-04	14
593	38	2004-02-04	2004-02-17	13
594	38	2004-02-17	2004-03-04	16
595	38	2004-03-04	2004-03-18	14
596	38	2004-03-18	2004-03-30	12
597	38	2004-03-30	2004-04-13	14
598	38	2004-04-13	2004-04-29	16
599	38	2004-04-29	2004-05-19	20
600	38	2004-05-19	2004-05-27	8
601	38	2004-05-27	2004-06-08	12
602	39	2003-07-12	2003-07-25	13
603	39	2003-07-25	2003-08-08	14
604	39	2003-08-08	2003-08-29	21
605	39	2003-08-29	2003-09-05	7
606	39	2003-09-05	2003-09-23	18
607	39	2003-09-23	2003-10-13	20
608	39	2003-10-13	2003-11-11	29
609	39	2003-11-11	2003-11-28	17
610	39	2003-11-28	2003-12-19	21
611	39	2003-12-19	2004-01-15	27
612	39	2004-01-15	2004-04-08	84
613	39	2004-04-08	2004-06-01	54
614	40	2003-07-12	2003-07-25	13
615	40	2003-07-25	2003-08-08	14
616	40	2003-08-08	2003-08-27	19
617	40	2003-08-27	2003-09-08	12
618	40	2003-09-08	2003-09-19	11
619	40	2003-09-19	2003-10-13	24
620	40	2003-10-13	2003-11-03	21
621	40	2003-11-03	2003-11-25	22
622	40	2003-11-25	2003-12-16	21
623	40	2003-12-16	2004-02-13	59
624	40	2004-02-13	2004-04-08	55
625	40	2004-04-08	2004-06-01	54
626	41	2003-07-12	2003-07-21	9
627	41	2003-07-21	2003-08-07	17
628	41	2003-08-07	2003-08-21	14
629	41	2003-08-21	2003-09-05	15
630	41	2003-09-05	2003-09-17	12
631	41	2003-09-17	2003-10-03	16
632	41	2003-10-03	2003-10-11	8
633	41	2003-10-11	2003-10-31	20
634	41	2003-10-31	2003-11-14	14
635	41	2003-11-14	2003-11-27	13
636	41	2003-11-27	2004-01-16	50
637	41	2004-01-16	2004-02-19	34
638	41	2004-02-19	2004-03-22	32
639	41	2004-03-22	2004-04-08	17
640	41	2004-04-08	2004-04-23	15
641	41	2004-04-23	2004-05-08	15
642	41	2004-05-08	2004-05-19	11
643	41	2004-05-19	2004-06-04	16
644	42	2003-07-16	2003-07-25	9
645	42	2003-07-25	2003-09-10	47
646	42	2003-09-10	2003-09-30	20
647	42	2003-09-30	2003-10-24	24
648	42	2003-10-24	2004-04-10	169
649	42	2004-04-10	2004-05-21	41
650	42	2004-05-21	2004-06-17	27
651	43	2003-07-17	2003-07-30	13
652	43	2003-07-30	2003-08-13	14
653	43	2003-08-13	2003-08-27	14
654	43	2003-08-27	2003-09-10	14
655	43	2003-09-10	2003-09-24	14
656	43	2003-09-24	2003-10-08	14
657	43	2003-10-08	2003-10-23	15
658	43	2003-10-23	2003-11-05	13
659	43	2003-11-05	2003-12-06	31
660	43	2003-12-06	2004-01-03	28
661	43	2004-01-03	2004-01-28	25
662	43	2004-01-28	2004-03-01	33
663	43	2004-03-01	2004-03-20	19
664	43	2004-03-20	2004-04-11	22
665	43	2004-04-11	2004-04-21	10
666	43	2004-04-21	2004-05-05	14
667	43	2004-05-05	2004-05-19	14
668	43	2004-05-19	2004-06-02	14
669	43	2004-06-02	2004-06-16	14
670	44	2003-07-17	2003-07-29	12
671	44	2003-07-29	2003-08-18	20
672	44	2003-08-18	2003-08-29	11
673	44	2003-08-29	2003-10-01	33
674	44	2003-10-01	2004-05-05	217
675	44	2004-05-05	2004-06-03	29
676	44	2004-06-03	2004-06-16	13
677	45	2004-01-13	2004-04-04	82
678	45	2004-04-04	2004-05-03	29
679	45	2004-05-03	2004-05-16	13
680	45	2004-05-16	2004-06-12	27
681	45	2004-06-12	2004-06-19	7
682	45	2004-06-19	2004-07-06	17
683	46	2003-07-19	2003-08-03	15
684	46	2003-08-03	2003-08-05	2
685	46	2003-08-05	2003-08-18	13
686	46	2003-08-18	2003-09-09	22
687	46	2003-09-09	2003-09-16	7
688	46	2003-09-16	2003-09-29	13
689	46	2003-09-29	2003-10-15	16
690	46	2003-10-15	2003-11-04	20
691	46	2003-11-04	2004-06-04	213
692	46	2004-06-04	2004-06-28	24
693	47	2003-07-20	2003-08-06	17
694	47	2003-08-06	2003-08-13	7
695	47	2003-08-13	2003-09-02	20
696	47	2003-09-02	2003-09-14	12
697	47	2003-10-13	2003-11-15	33
698	47	2004-05-17	2004-06-01	15
699	47	2004-06-01	2004-06-18	17
700	48	2003-07-20	2003-08-27	38
701	48	2003-08-27	2003-09-19	23
702	48	2003-09-19	2003-10-17	28
703	48	2003-10-17	2003-11-12	26
704	48	2003-11-12	2004-01-15	64
705	48	2004-01-15	2004-04-20	96
706	48	2004-04-20	2004-05-27	37
707	48	2004-06-13	2004-06-30	17
708	49	2003-08-05	2003-08-22	17
709	49	2003-08-22	2003-09-14	23
710	49	2003-09-14	2003-10-05	21
711	49	2003-10-05	2004-01-01	88
712	49	2004-01-01	2004-06-01	152
713	49	2004-06-01	2004-06-07	6
714	50	2003-07-21	2003-08-07	17
715	50	2003-08-07	2003-08-21	14
716	50	2003-08-21	2003-09-01	11
717	50	2003-09-01	2003-09-18	17
718	50	2003-09-18	2003-09-23	5
719	50	2003-09-23	2003-10-17	24
720	50	2003-10-17	2004-03-11	146
721	50	2004-03-11	2004-04-06	26
722	50	2004-04-06	2004-05-06	30
723	50	2004-05-06	2004-06-11	36
724	50	2004-06-11	2004-06-23	12
725	51	2003-11-05	2004-04-05	152
726	51	2004-04-05	2004-05-17	42
727	51	2004-05-17	2004-06-04	18
728	51	2004-06-04	2004-06-15	11
729	18	2004-08-30	2004-09-10	11
730	18	2004-09-10	2004-09-20	10
731	18	2004-09-20	2004-09-30	10
732	18	2004-09-30	2004-10-15	15
733	18	2004-10-15	2004-10-30	15
734	52	2003-10-14	2003-12-02	49
735	52	2004-05-08	2004-05-28	20
736	52	2004-05-28	2004-06-18	21
737	53	2003-10-14	2003-12-02	49
738	53	2003-12-02	2004-05-28	178
739	53	2004-05-28	2004-06-18	21
740	54	2003-10-14	2003-12-02	49
741	54	2003-12-02	2004-06-18	199
742	55	2003-10-14	2003-12-02	49
743	55	2003-12-02	2004-04-20	140
744	55	2004-04-20	2004-05-28	38
745	55	2004-05-28	2004-06-18	21
746	56	2003-10-14	2003-12-02	49
747	56	2003-12-02	2004-04-20	140
748	56	2004-04-20	2004-05-28	38
749	56	2004-05-28	2004-06-18	21
750	57	2003-10-14	2003-12-02	49
751	57	2003-12-02	2004-06-18	199
752	58	2003-10-14	2003-12-02	49
753	58	2003-12-02	2004-04-20	140
754	58	2004-04-20	2004-05-28	38
755	58	2004-05-28	2004-06-18	21
756	59	2003-10-14	2003-12-02	49
757	59	2003-12-02	2004-05-28	178
758	59	2004-05-28	2004-06-18	21
759	60	2003-10-14	2003-12-02	49
760	60	2003-12-02	2004-06-18	199
761	61	2003-10-14	2003-12-02	49
762	61	2003-12-02	2004-05-28	178
763	61	2004-05-28	2004-06-18	21
764	5	2004-06-16	2004-06-30	14
765	5	2004-06-30	2004-07-13	13
766	5	2004-07-13	2004-08-10	28
767	5	2004-08-10	2004-08-16	6
768	5	2004-08-16	2004-09-08	23
769	5	2004-08-16	2004-10-20	65
771	22	2003-12-31	2004-02-01	32
772	22	2004-02-01	2004-03-01	29
773	22	2004-03-01	2004-03-30	29
774	22	2004-03-30	2004-05-01	32
775	22	2004-05-01	2004-06-01	31
776	22	2004-06-01	2004-06-23	22
777	22	2004-06-23	2004-07-18	25
778	22	2004-07-18	2004-08-01	14
779	22	2004-08-01	2004-08-23	22
780	22	2004-08-23	2004-09-18	26
781	22	2004-09-18	2004-10-24	36
782	22	2004-10-24	2004-12-01	38
783	22	2004-12-01	2005-01-03	33
784	2	2003-11-04	2004-01-28	85
785	2	2004-01-28	2004-06-18	142
786	2	2004-06-18	2004-06-21	3
787	2	2004-06-21	2004-07-20	29
788	2	2004-07-20	2004-08-11	22
789	2	2004-08-11	2004-09-07	27
790	2	2004-09-07	2004-09-22	15
791	2	2004-09-22	2004-10-21	29
792	2	2004-10-21	2004-12-02	42
793	3	2003-11-04	2003-12-12	38
794	3	2003-12-12	2004-01-28	47
795	3	2004-01-28	2004-04-28	91
796	3	2004-04-28	2004-06-18	51
797	3	2004-06-18	2004-06-21	3
798	3	2004-06-21	2004-07-20	29
799	3	2004-07-20	2004-08-11	22
800	3	2004-08-11	2004-09-07	27
801	3	2004-09-07	2004-09-22	15
802	3	2004-09-22	2004-10-21	29
803	3	2004-10-21	2004-12-02	42
804	4	2003-11-04	2003-12-12	38
805	4	2003-12-12	2004-01-28	47
806	4	2004-01-28	2004-04-28	91
807	4	2004-04-28	2004-06-18	51
808	4	2004-06-18	2004-06-21	3
809	4	2004-06-21	2004-07-20	29
810	4	2004-07-20	2004-08-11	22
811	4	2004-08-11	2004-09-07	27
812	4	2004-09-07	2004-09-22	15
813	4	2004-09-22	2004-10-21	29
814	4	2004-10-21	2004-12-02	42
816	24	2003-06-26	2003-07-15	19
817	24	2003-07-15	2003-08-01	17
818	24	2003-08-01	2003-08-18	17
819	24	2003-08-18	2003-09-13	26
820	24	2003-09-13	2003-12-10	88
821	24	2003-12-10	2004-03-25	106
822	24	2004-03-25	2004-05-06	42
823	24	2004-05-06	2004-05-19	13
824	36	2004-06-10	2004-06-11	1
825	36	2004-06-11	2004-07-03	22
826	36	2004-07-03	2004-07-14	11
827	36	2004-07-14	2004-08-06	23
828	36	2004-08-06	2004-09-08	33
829	36	2004-09-08	2005-01-20	134
831	37	2004-05-20	2004-06-11	22
832	37	2004-06-11	2004-07-03	22
833	37	2004-07-03	2004-07-14	11
834	37	2004-07-14	2004-08-06	23
835	37	2004-08-06	2004-09-08	33
836	22	2005-01-03	2005-02-01	29
837	22	2005-02-02	2005-03-01	27
838	22	2005-03-01	2005-04-01	31
839	22	2005-04-01	2005-04-25	24
840	22	2005-04-25	2005-05-20	25
841	1	2004-06-16	2004-06-27	11
842	1	2004-06-27	2004-07-14	17
843	1	2004-07-14	2004-08-10	27
844	1	2004-08-10	2004-08-25	15
845	1	2004-08-25	2004-09-10	16
846	1	2004-09-10	2004-10-01	21
847	1	2004-10-01	2004-10-26	25
848	1	2004-10-26	2004-12-29	64
849	1	2004-12-29	2005-03-03	64
850	6	2004-06-27	2004-07-01	4
851	6	2004-07-01	2004-07-26	25
852	6	2004-07-26	2004-08-18	23
853	6	2004-08-18	2004-09-04	17
854	6	2004-09-04	2004-09-20	16
855	6	2004-09-20	2004-10-04	14
856	6	2004-10-04	2004-11-01	28
857	6	2004-11-01	2004-12-06	35
858	7	2004-06-27	2004-07-01	4
859	7	2004-07-01	2004-07-26	25
860	7	2004-08-18	2004-09-04	17
861	7	2004-09-04	2004-09-20	16
862	7	2004-09-20	2004-10-04	14
863	7	2004-10-04	2004-11-01	28
864	7	2004-11-01	2004-12-06	35
865	9	2004-05-31	2004-06-19	19
866	9	2004-06-19	2004-07-11	22
867	9	2004-07-11	2004-08-07	27
868	9	2004-08-07	2004-08-17	10
869	9	2004-08-17	2004-09-01	15
870	9	2004-09-01	2004-09-20	19
871	9	2004-09-20	2004-09-30	10
872	9	2004-09-30	2004-10-25	25
873	9	2004-10-25	2004-12-19	55
874	9	2004-12-19	2005-03-25	96
875	9	2005-03-25	2005-05-01	37
876	10	2004-06-18	2004-07-01	13
877	10	2004-07-01	2004-07-28	27
878	10	2004-07-28	2004-09-16	50
879	10	2004-09-16	2004-12-16	91
880	10	2004-12-16	2005-03-03	77
881	11	2004-06-16	2004-07-09	23
882	11	2004-07-09	2004-07-21	12
883	11	2004-07-21	2004-07-29	8
884	11	2004-07-29	2004-08-14	16
885	11	2004-08-14	2004-08-27	13
886	11	2004-08-27	2004-09-14	18
887	11	2004-09-14	2004-10-09	25
888	12	2004-04-24	2004-05-16	22
889	12	2004-05-16	2004-06-13	28
890	12	2004-06-13	2004-06-27	14
891	12	2004-06-27	2004-07-17	20
892	12	2004-07-17	2004-08-01	15
893	12	2004-08-01	2004-08-09	8
894	12	2004-08-09	2004-08-19	10
895	12	2004-08-19	2004-08-28	9
896	12	2004-08-28	2004-09-11	14
897	12	2004-09-11	2004-10-02	21
898	12	2004-10-02	2004-10-31	29
899	12	2004-10-31	2004-12-04	34
900	12	2004-12-04	2005-01-05	32
901	13	2003-06-24	2003-07-22	28
902	13	2003-07-22	2003-08-05	14
903	13	2003-08-05	2003-09-03	29
904	13	2003-09-03	2003-09-17	14
905	13	2003-09-17	2003-10-03	16
906	13	2003-10-03	2003-10-14	11
907	13	2003-10-14	2003-11-14	31
908	13	2003-11-14	2003-12-09	25
909	13	2004-05-25	2004-06-08	14
910	13	2004-06-08	2004-06-23	15
911	13	2004-06-23	2004-07-07	14
912	13	2004-07-07	2004-08-08	32
913	13	2004-08-08	2004-08-17	9
914	13	2004-08-17	2004-09-08	22
915	13	2004-09-08	2004-10-27	49
916	13	2004-10-27	2004-12-15	49
917	13	2004-12-15	2005-03-03	78
918	14	2003-06-24	2003-07-22	28
919	14	2003-07-22	2003-08-05	14
920	14	2003-08-05	2003-09-03	29
921	14	2003-09-03	2003-09-17	14
922	14	2003-09-17	2003-10-01	14
923	14	2003-10-01	2003-10-14	13
924	14	2003-10-14	2003-11-14	31
925	14	2003-11-14	2003-12-09	25
927	14	2004-06-08	2004-06-23	15
928	14	2004-06-23	2004-07-07	14
929	14	2004-07-07	2004-08-08	32
930	14	2004-08-08	2004-08-17	9
931	14	2004-08-17	2004-09-08	22
932	14	2004-09-08	2004-10-27	49
933	14	2004-10-27	2004-12-15	49
934	14	2004-12-15	2005-03-03	78
935	15	2003-06-24	2003-07-22	28
936	15	2003-07-22	2003-08-05	14
937	15	2003-08-05	2003-08-18	13
938	15	2003-08-18	2003-09-03	16
939	15	2003-09-03	2003-09-17	14
940	15	2003-09-17	2003-10-01	14
941	15	2003-10-01	2003-10-14	13
942	15	2003-10-14	2003-11-14	31
943	15	2003-11-14	2003-12-09	25
944	15	2004-05-25	2004-06-23	29
945	15	2004-06-23	2004-07-07	14
946	15	2004-07-07	2004-08-08	32
947	15	2004-08-08	2004-09-08	31
948	15	2004-09-08	2004-10-27	49
949	15	2004-10-27	2004-12-15	49
950	15	2004-12-15	2005-03-03	78
951	16	2003-06-24	2003-07-22	28
952	16	2003-07-22	2003-09-03	43
953	16	2003-09-03	2003-09-17	14
954	16	2003-09-17	2003-10-01	14
955	16	2003-10-01	2003-10-14	13
956	16	2003-10-14	2003-11-14	31
957	16	2003-11-14	2003-12-09	25
958	16	2004-05-25	2004-06-08	14
959	16	2004-06-08	2004-06-23	15
960	16	2004-06-23	2004-07-07	14
961	16	2004-07-07	2004-08-08	32
962	16	2004-08-08	2004-09-08	31
963	16	2004-09-08	2004-10-27	49
964	16	2004-10-27	2004-12-15	49
965	16	2004-12-15	2005-03-03	78
966	17	2004-05-19	2004-06-10	22
967	17	2004-06-10	2004-07-13	33
968	17	2004-07-13	2004-08-20	38
969	17	2004-08-20	2004-10-10	51
970	17	2004-10-10	2004-10-25	15
971	17	2004-10-25	2004-11-16	22
972	17	2004-11-16	2004-12-06	20
973	17	2004-12-06	2004-12-23	17
974	17	2004-12-23	2005-03-01	68
975	20	2003-10-26	2003-12-16	51
976	20	2003-12-16	2004-04-01	107
977	20	2004-04-01	2004-04-29	28
978	20	2004-04-29	2004-05-27	28
979	20	2004-05-27	2004-06-11	15
980	20	2004-06-11	2004-06-26	15
981	20	2004-06-26	2004-07-28	32
982	20	2004-07-28	2004-08-24	27
983	20	2004-08-24	2004-10-20	57
984	20	2004-10-20	2004-11-14	25
985	21	2003-10-20	2003-12-11	52
986	21	2003-12-11	2004-03-23	103
987	21	2004-03-23	2004-04-14	22
988	21	2004-04-14	2004-04-30	16
989	21	2004-04-30	2004-05-19	19
990	21	2004-05-19	2004-05-27	8
991	21	2004-05-27	2004-06-07	11
992	21	2004-06-07	2004-06-23	16
993	21	2004-06-23	2004-07-26	33
994	21	2004-07-26	2004-08-20	25
995	21	2004-08-20	2004-09-17	28
996	21	2004-09-17	2004-11-30	74
997	21	2004-11-30	2005-01-10	41
998	47	2004-06-18	2004-07-20	32
999	47	2004-07-20	2004-10-18	90
1009	23	2004-06-03	2004-06-18	15
1010	23	2004-06-18	2004-07-02	14
1011	23	2004-07-15	2004-07-29	14
1012	23	2004-07-29	2004-08-12	14
1013	23	2004-08-12	2004-08-27	15
1014	23	2004-08-27	2004-09-09	13
1015	23	2004-09-09	2004-09-15	6
1016	23	2004-09-15	2004-09-23	8
1017	23	2004-09-23	2004-10-07	14
1018	23	2004-10-07	2004-10-22	15
1019	23	2004-10-22	2004-11-03	12
1020	23	2004-11-03	2004-11-17	14
1021	23	2004-11-17	2004-12-02	15
1022	23	2004-12-02	2004-12-16	14
1023	23	2004-12-16	2004-12-30	14
1024	18	2004-12-07	2005-02-12	67
1025	18	2005-02-12	2005-04-11	58
1026	18	2005-04-11	2005-04-19	8
1027	1008	2005-04-20	2005-04-25	5
1028	1008	2005-04-25	2005-04-30	5
1029	1008	2005-04-30	2005-05-05	5
1030	1008	2005-05-05	2005-05-10	5
1031	1008	2005-05-10	2005-05-15	5
1032	1008	2005-05-15	2005-05-20	5
1033	27	2004-06-16	2004-07-01	15
1034	27	2004-07-01	2004-07-20	19
1035	27	2004-07-20	2004-08-03	14
1036	27	2004-08-03	2004-08-23	20
1037	27	2004-08-23	2004-09-06	14
1038	27	2004-09-06	2004-09-20	14
1039	27	2004-09-20	2004-10-04	14
1040	27	2004-10-04	2004-10-18	14
1041	27	2004-10-18	2004-11-05	18
1042	27	2004-11-05	2004-12-20	45
1043	27	2004-12-20	2005-01-14	25
1044	27	2005-01-14	2005-01-31	17
1045	27	2005-01-31	2005-02-18	18
1046	27	2005-02-18	2005-03-04	14
1047	29	2004-07-11	2004-07-30	19
1048	29	2004-07-30	2004-08-20	21
1049	29	2004-08-20	2004-09-15	26
1050	29	2004-09-15	2004-10-21	36
1051	29	2004-10-21	2004-11-25	35
1052	29	2004-11-25	2005-03-20	115
1053	29	2005-03-20	2005-04-09	20
1054	30	2004-07-03	2004-08-13	41
1055	30	2004-08-13	2004-08-19	6
1056	30	2004-08-19	2004-10-28	70
1057	31	2004-05-25	2004-06-09	15
1058	31	2004-06-09	2004-06-29	20
1059	31	2004-06-29	2004-07-14	15
1060	31	2004-07-14	2004-07-30	16
1061	31	2004-07-30	2004-08-11	12
1062	31	2004-08-11	2004-08-22	11
1063	31	2004-08-22	2004-09-23	32
1064	31	2004-09-23	2004-11-03	41
1065	31	2004-12-11	2005-01-05	25
1066	31	2005-01-05	2005-01-24	19
1067	32	2004-06-02	2004-06-17	15
1068	32	2004-06-17	2004-07-02	15
1069	32	2004-07-02	2004-07-17	15
1070	32	2004-07-17	2004-07-31	14
1071	32	2004-07-31	2004-08-14	14
1072	32	2004-08-14	2004-08-29	15
1073	32	2004-08-29	2004-09-14	16
1074	32	2004-09-14	2004-10-05	21
1075	32	2004-10-05	2004-10-16	11
1076	32	2004-10-16	2004-11-28	43
1077	32	2004-11-28	2005-01-12	45
1078	33	2004-05-30	2004-06-16	17
1079	33	2004-06-16	2004-07-09	23
1080	33	2004-07-09	2004-07-25	16
1081	33	2004-07-25	2004-08-09	15
1082	33	2004-08-09	2004-08-25	16
1083	33	2004-08-25	2004-09-10	16
1084	33	2004-09-10	2004-09-28	18
1085	33	2004-09-28	2004-10-15	17
1086	33	2004-10-15	2004-11-02	18
1087	33	2004-11-02	2004-11-19	17
1088	33	2004-11-19	2004-12-08	19
1089	33	2004-12-08	2005-01-12	35
1090	33	2005-01-12	2005-01-31	19
1091	34	2004-06-04	2004-06-15	11
1092	34	2004-06-15	2004-07-09	24
1093	34	2004-07-09	2004-07-23	14
1094	34	2004-07-23	2004-08-07	15
1095	34	2004-08-07	2004-08-20	13
1096	34	2004-08-20	2004-09-02	13
1097	34	2004-09-02	2004-09-14	12
1098	34	2004-09-14	2004-09-24	10
1099	35	2004-06-06	2004-06-25	19
1100	35	2004-06-25	2004-07-14	19
1101	35	2004-07-14	2004-07-23	9
1102	35	2004-07-23	2004-08-07	15
1103	35	2004-08-07	2004-08-19	12
1104	35	2004-08-19	2004-09-05	17
1105	35	2004-09-05	2004-09-29	24
1106	35	2004-09-29	2004-10-10	11
1107	35	2004-10-10	2004-10-24	14
1108	35	2004-10-24	2004-11-21	28
1109	35	2004-11-21	2004-12-18	27
1110	35	2004-12-18	2005-01-01	14
1111	37	2004-09-08	2005-01-20	134
1112	38	2004-06-08	2004-06-15	7
1113	38	2004-06-15	2004-06-23	8
1114	38	2004-06-23	2004-06-29	6
1115	38	2004-06-29	2004-07-07	8
1116	38	2004-07-07	2004-07-12	5
1117	38	2004-07-12	2004-07-18	6
1118	38	2004-07-18	2004-07-24	6
1119	38	2004-07-24	2004-08-03	10
1120	38	2004-08-03	2004-08-10	7
1121	38	2004-08-10	2004-08-15	5
1122	38	2004-08-15	2004-08-25	10
1123	38	2004-08-25	2004-08-31	6
1124	38	2004-08-31	2004-09-08	8
1125	38	2004-09-08	2004-09-22	14
1126	38	2004-09-22	2004-09-28	6
1127	38	2004-09-28	2004-10-11	13
1128	38	2004-10-11	2004-10-13	2
1129	38	2004-10-13	2004-10-31	18
1130	38	2004-10-31	2004-11-15	15
1131	38	2004-11-15	2004-12-06	21
1132	38	2004-12-06	2005-01-01	26
1133	38	2005-01-01	2005-01-10	9
1134	38	2005-01-10	2005-02-01	22
1135	39	2004-06-01	2004-06-12	11
1136	39	2004-06-12	2004-07-13	31
1137	39	2004-07-13	2004-07-31	18
1138	39	2004-07-31	2004-08-06	6
1139	39	2004-08-06	2004-08-20	14
1140	39	2004-08-20	2004-09-07	18
1141	39	2004-09-07	2004-09-22	15
1142	39	2004-09-22	2004-11-01	40
1143	39	2004-12-06	2005-02-07	63
1144	39	2005-02-07	2005-02-17	10
1145	40	2004-06-01	2004-07-13	42
1146	40	2004-07-30	2004-08-13	14
1147	40	2004-08-13	2004-08-28	15
1148	40	2004-08-28	2004-09-10	13
1149	40	2004-09-10	2004-09-28	18
1150	40	2004-09-28	2004-11-15	48
1151	40	2004-11-15	2004-12-14	29
1152	40	2004-12-14	2005-01-05	22
1153	40	2005-01-12	2005-02-17	36
1154	41	2004-06-04	2004-06-18	14
1155	41	2004-06-18	2004-07-02	14
1156	41	2004-07-02	2004-07-09	7
1157	41	2004-07-09	2004-07-23	14
1158	41	2004-07-23	2004-08-03	11
1159	41	2004-08-03	2004-08-06	3
1160	41	2004-08-06	2004-08-20	14
1161	41	2004-08-20	2004-09-17	28
1162	41	2004-09-17	2004-10-15	28
1163	41	2004-10-15	2004-11-26	42
1164	41	2004-11-26	2005-02-04	70
1165	42	2004-06-17	2004-07-04	17
1166	42	2004-07-04	2004-08-04	31
1167	42	2004-08-04	2005-04-20	259
1168	43	2004-06-16	2004-06-30	14
1169	43	2004-06-30	2004-07-14	14
1170	43	2004-07-14	2004-07-28	14
1171	43	2004-07-28	2004-08-11	14
1172	43	2004-08-11	2004-08-25	14
1173	43	2004-08-25	2004-09-08	14
1174	43	2004-09-08	2004-09-22	14
1175	43	2004-09-22	2004-10-06	14
1176	43	2004-10-06	2004-10-20	14
1177	43	2004-10-20	2004-11-03	14
1178	43	2004-11-03	2004-11-17	14
1179	43	2004-11-17	2004-12-01	14
1180	43	2004-12-01	2004-12-28	27
1181	43	2004-12-28	2005-01-22	25
1182	43	2005-01-22	2005-03-05	42
1183	43	2005-03-05	2005-04-08	34
1184	43	2005-04-08	2005-04-23	15
1185	44	2004-06-16	2004-07-05	19
1186	44	2004-07-05	2004-07-25	20
1187	44	2004-07-25	2004-08-09	15
1188	44	2004-08-09	2004-08-23	14
1189	44	2004-08-23	2004-09-24	32
1190	44	2004-09-24	2004-10-21	27
1191	44	2004-10-21	2005-04-20	181
1192	45	2004-07-06	2004-07-18	12
1193	45	2004-07-18	2004-08-03	16
1194	45	2004-08-03	2004-09-04	32
1195	45	2004-09-04	2004-10-03	29
1196	45	2004-10-03	2004-11-15	43
1197	45	2004-11-15	2005-01-15	61
1198	45	2005-01-15	2005-04-17	92
1199	46	2004-06-28	2004-07-15	17
1200	46	2004-07-15	2004-07-26	11
1201	46	2004-07-26	2004-08-15	20
1202	46	2004-08-15	2004-08-30	15
1203	46	2004-08-30	2004-09-13	14
1204	46	2004-09-13	2004-10-04	21
1205	46	2004-10-04	2004-10-25	21
1206	46	2004-10-25	2004-12-20	56
1207	48	2004-06-30	2004-07-08	8
1208	48	2004-07-08	2004-07-29	21
1209	48	2004-07-29	2004-08-13	15
1210	48	2004-08-13	2004-09-01	19
1211	48	2004-09-01	2004-09-21	20
1212	48	2004-09-21	2004-10-19	28
1213	48	2004-10-19	2004-12-17	59
1214	48	2004-12-17	2005-01-24	38
1215	48	2005-01-24	2005-03-04	39
1216	48	2005-03-04	2005-04-22	49
1217	49	2004-06-07	2004-06-15	8
1218	49	2004-06-15	2004-06-25	10
1219	49	2004-06-25	2004-06-30	5
1220	49	2004-06-30	2004-07-22	22
1221	49	2004-07-22	2004-12-31	162
1222	50	2004-06-23	2004-07-08	15
1223	50	2004/07/30	2004-08-05	6
1224	50	2004-08-05	2004-08-12	7
1225	50	2004-08-12	2004-08-19	7
1226	50	2004-08-19	2004-09-03	15
1227	50	2004-09-03	2004-09-12	9
1228	50	2004-09-12	2004-09-21	9
1229	50	2004-09-21	2004-10-14	23
1230	50	2004-10-14	2005-03-07	144
1231	51	2004-06-15	2004-07-06	21
1232	51	2004-07-06	2004-07-21	15
1233	51	2004-07-21	2004-08-12	22
1234	51	2004-08-12	2004-08-25	13
1235	51	2004-08-25	2004-09-13	19
1236	51	2004-09-13	2004-09-27	14
1237	52	2004-06-18	2004-07-09	21
1238	52	2004-07-09	2004-07-23	14
1239	52	2004-07-23	2004-08-05	13
1240	52	2004-08-05	2004-08-20	15
1241	52	2004-08-20	2004-09-03	14
1242	52	2004-09-03	2004-09-24	21
1243	52	2004-09-24	2004-10-15	21
1244	53	2004-06-18	2004-07-09	21
1245	53	2004-07-09	2004-07-23	14
1246	53	2004-07-23	2004-08-05	13
1247	53	2004-08-05	2004-08-20	15
1248	53	2004-08-20	2004-09-03	14
1249	53	2004-09-03	2004-09-24	21
1250	53	2004-09-24	2004-10-15	21
1251	54	2004-06-18	2004-07-09	21
1252	54	2004-07-09	2004-07-23	14
1253	54	2004-07-23	2004-08-05	13
1254	54	2004-08-05	2004-08-20	15
1255	54	2004-08-20	2004-09-03	14
1256	54	2004-09-03	2004-09-24	21
1257	54	2004-09-24	2004-10-15	21
1258	55	2004-06-18	2004-07-09	21
1259	55	2004-07-09	2004-07-23	14
1260	55	2004-07-23	2004-08-05	13
1261	55	2004-08-05	2004-08-20	15
1262	55	2004-08-20	2004-09-03	14
1263	55	2004-09-03	2004-09-24	21
1264	55	2004-09-24	2004-10-15	21
1265	56	2004-06-18	2004-07-09	21
1266	56	2004-07-09	2004-07-23	14
1267	56	2004-07-23	2004-08-05	13
1268	56	2004-08-05	2004-08-20	15
1269	56	2004-08-20	2004-09-03	14
1270	56	2004-09-03	2004-09-24	21
1271	56	2004-09-24	2004-10-15	21
1272	57	2004-06-18	2004-07-09	21
1273	57	2004-07-09	2004-07-23	14
1274	57	2004-07-23	2004-08-05	13
1275	57	2004-08-05	2004-08-20	15
1276	57	2004-08-20	2004-09-03	14
1277	57	2004-09-03	2004-09-24	21
1278	57	2004-09-24	2004-10-15	21
1279	58	2004-06-18	2004-07-09	21
1280	58	2004-07-09	2004-07-23	14
1281	58	2004-07-23	2004-08-05	13
1282	58	2004-08-05	2004-08-20	15
1283	58	2004-08-20	2004-09-03	14
1284	58	2004-09-03	2004-09-24	21
1285	58	2004-09-24	2004-10-15	21
1286	59	2004-06-18	2004-07-09	21
1287	59	2004-07-09	2004-07-23	14
1288	59	2004-07-23	2004-08-05	13
1289	59	2004-08-05	2004-08-20	15
1290	59	2004-08-20	2004-09-03	14
1291	59	2004-09-03	2004-09-24	21
1292	59	2004-09-24	2004-10-15	21
1293	60	2004-06-18	2004-07-09	21
1294	60	2004-07-09	2004-07-23	14
1295	60	2004-07-23	2004-08-05	13
1296	60	2004-08-05	2004-08-20	15
1297	60	2004-08-20	2004-09-03	14
1298	60	2004-09-03	2004-09-24	21
1299	60	2004-09-24	2004-10-15	21
1300	61	2004-06-18	2004-07-09	21
1301	61	2004-07-09	2004-07-23	14
1302	61	2004-07-23	2004-08-05	13
1303	61	2004-08-05	2004/08/20	15
1304	61	2004/08/20	2004-09-03	14
1305	61	2004-09-03	2004-09-24	21
1306	61	2004-09-24	2004-10-14	20
1307	23	2004-12-30	2005-01-27	28
1308	24	2004-05-19	2004-06-27	39
1309	24	2004-06-27	2004-07-22	25
1310	24	2004-07-22	2004-09-25	65
1311	24	2004-09-25	2005/01/19	116
1312	22	2005-05-20	2005-06-01	12
1313	22	2005-06-01	2005-06-15	14
1314	22	2005-06-15	2005-06-29	14
1315	22	2005-06-29	2005-07-18	19
1316	22	2005-07-18	2005-08-01	14
1317	1000	2005-04-04	2005-05-05	31
1318	1000	2005-05-05	2005-05-20	15
1319	1000	2005-05-20	2005-06-04	15
1320	1000	2005-06-04	2005-06-19	15
1321	1000	2005-06-19	2005-06-27	8
1322	1000	2005-06-27	2005-07-02	5
1323	1000	2005-07-02	2005-07-12	10
1324	1000	2005-07-12	2005-07-18	6
1325	1000	2005-07-18	2005-08-02	15
1326	1001	2005-04-04	2005-05-05	31
1327	1001	2005-05-05	2005-05-20	15
1328	1001	2005-05-20	2005-06-04	15
1329	1001	2005-06-04	2005-06-19	15
1330	1001	2005-06-19	2005-06-27	8
1331	1001	2005-06-27	2005-07-02	5
1332	1001	2005-07-02	2005-07-12	10
1333	1001	2005-07-12	2005-07-18	6
1334	1001	2005-07-18	2005-07-25	7
1335	1001	2005-07-25	2005-08-02	8
1336	1008	2005-05-20	2005-05-25	5
1337	1008	2005-05-25	2005-05-30	5
1338	1008	2005-05-30	2005-06-05	6
1339	1008	2005-06-05	2005-06-10	5
1340	1008	2005-06-10	2005-06-15	5
1341	1008	2005-06-15	2005-06-20	5
1342	1008	2005-06-20	2005-06-25	5
1343	1008	2005-06-25	2005-06-30	5
1344	1008	2005-06-30	2005-07-05	5
1345	1008	2005-07-05	2005-07-10	5
1346	1008	2005-07-10	2005-07-15	5
1347	1008	2005-07-15	2005-07-20	5
1348	1008	2005-07-20	2005-07-25	5
1349	1008	2005-07-25	2005-07-30	5
1350	1008	2005-07-30	2005-08-05	6
1351	1008	2005-08-05	2005-08-10	5
1352	1008	2005-08-10	2005-08-15	5
1354	1001	2005-08-02	2005-08-13	11
1355	1001	2005-08-13	2005-08-24	11
1358	47	2003-11-15	2004-05-17	184
1359	1000	2005-08-02	2005-08-13	11
1360	1000	2005-08-13	2005-08-24	11
1361	1001	2005-08-24	2005-09-12	19
1362	1000	2005-08-24	2005-09-12	19
1363	22	2005-08-01	2005-08-19	18
1364	22	2005-08-19	2005-09-12	24
1365	22	2005-09-12	2005-10-03	21
1366	1001	2005-09-12	2005-10-10	28
1367	1000	2005-09-12	2005-10-10	28
1368	1002	2005-03-05	2005-04-02	28
1369	1002	2005-04-02	2005-04-26	24
1370	1002	2005-04-26	2005-05-14	18
1371	1002	2005-05-14	2005-06-04	21
1372	1002	2005-06-04	2005-06-18	14
1373	1002	2005-06-18	2005-06-25	7
1374	1002	2005-06-25	2005-07-07	12
1375	1002	2005-07-07	2005-07-15	8
1376	1002	2005-07-15	2005-07-23	8
1378	1002	2005-07-23	2005-08-12	20
1379	1002	2005-08-12	2005-08-24	12
1380	1002	2005-08-24	2005-09-12	19
1381	1003	2005-03-04	2005-04-03	30
1382	1003	2005-04-03	2005-04-26	23
1383	1003	2005-04-26	2005-05-22	26
1384	1003	2005-05-22	2005-06-05	14
1385	1003	2005-06-05	2005-06-18	13
1386	1003	2005-06-18	2005-06-27	9
1387	1003	2005-06-27	2005-07-10	13
1388	1003	2005-07-10	2005-07-24	14
1389	1003	2005-07-24	2005-09-12	50
1390	22	2005-10-03	2005-10-29	26
1391	29	2005-04-09	2005-05-06	27
1392	29	2005-05-06	2005-05-21	15
1393	29	2005-05-21	2005-06-04	14
1394	29	2005-06-04	2005-06-21	17
1395	29	2005-06-21	2005-07-12	21
1396	29	2005-07-12	2005-08-15	34
1397	29	2005-08-15	2005-08-26	11
1398	29	2005-08-26	2005-09-16	21
1399	29	2005-09-16	2005-10-27	41
1400	23	2005-01-27	2005-02-26	30
1401	23	2005-02-26	2005-03-24	26
1402	23	2005-03-24	2005-04-07	14
1403	23	2005-04-07	2005-04-21	14
1404	23	2005-04-21	2005-05-05	14
1405	23	2005-05-05	2005-05-19	14
1406	23	2005-05-19	2005-06-02	14
1407	23	2005-06-02	2005-06-16	14
1408	23	2005-06-16	2005-06-30	14
1409	23	2005-06-30	2005-07-14	14
1410	23	2005-07-14	2005-07-28	14
1411	23	2005-07-28	2005-08-11	14
1412	23	2005-08-11	2005-08-25	14
1413	23	2005-08-25	2005-09-08	14
1414	23	2005-09-08	2005-09-22	14
1415	23	2005-09-22	2005-10-06	14
1416	23	2005-10-06	2005-10-21	15
1417	1005	2005-01-19	2005-05-01	102
1418	1005	2005-05-01	2005-05-22	21
1419	1005	2005-05-22	2005-07-15	54
1420	1005	2005-07-15	2005-07-30	15
1421	1005	2005-07-30	2005-09-26	58
1422	1006	2005-01-19	2005-05-01	102
1423	1006	2005-05-01	2005-05-22	21
1424	1006	2005-05-22	2005-07-15	54
1425	1006	2005-07-15	2005/07/30	15
1426	1006	2005-07-30	2005-09-26	58
1427	22	2005-10-29	2005-12-01	33
1428	1000	2005-10-10	2005-11-12	33
1429	1000	2005-11-12	2005-12-28	46
1430	1000	2005-12-28	2006-03-16	78
1431	1000	2006-03-16	2006-04-27	42
1432	1000	2006-04-27	2006-05-18	21
1433	1000	2006-05-18	2006-06-15	28
1434	1001	2005-10-10	2005-11-12	33
1435	1001	2005-11-12	2005-12-28	46
1436	38	2005-02-01	2005-02-25	24
1437	38	2005-02-25	2005-03-30	33
1438	38	2005-03-30	2005-04-16	17
1439	38	2005-04-16	2005-04-26	10
1440	38	2005-04-26	2005-05-05	9
1441	38	2005-05-05	2005-05-16	11
1442	38	2005-05-16	2005-05-24	8
1443	38	2005-05-24	2005-05-31	7
1444	38	2005-05-31	2005-06-05	5
1445	38	2005-06-05	2005-06-13	8
1446	38	2005-06-13	2005-06-20	7
1447	38	2005-06-20	2005-06-28	8
1448	38	2005-06-28	2005-07-02	4
1449	38	2005-07-02	2005-07-09	7
1450	38	2005-07-09	2005-07-14	5
1451	38	2005-07-14	2005-07-21	7
1452	38	2005-07-21	2005-07-28	7
1453	38	2005-07-28	2005-08-05	8
1454	38	2005-08-05	2005-08-10	5
1455	38	2005-08-10	2005-08-18	8
1456	38	2005-08-18	2005-08-30	12
1457	22	2005-12-01	2006-01-04	34
1458	28	2004-07-16	2004-08-02	17
1459	28	2004-08-02	2004-08-19	17
1460	28	2004-08-19	2004-09-06	18
1461	28	2004-09-06	2004-09-21	15
1462	28	2005-04-01	2005-04-10	9
1463	28	2004-09-21	2005-04-01	192
1464	28	2005-04-10	2005-06-06	57
1465	28	2005-06-06	2005-07-05	29
1466	28	2005-07-05	2005-07-17	12
1467	28	2005-07-17	2005-08-09	23
1468	28	2005-08-09	2005-09-02	24
1469	28	2005-09-02	2005-11-08	67
1470	28	2005-11-08	2006-01-11	64
1473	1001	2005-12-28	2006-03-16	78
1476	23	2005-10-21	2005-11-03	13
1477	23	2005-11-03	2005-11-17	14
1478	23	2005-11-17	2005-12-01	14
1479	23	2005-12-01	2005-12-15	14
1480	23	2005-12-15	2005-12-28	13
1481	22	2006-01-04	2006-04-04	90
1482	29	2005-10-27	2005-12-12	46
1483	1008	2005-08-15	2005-08-20	5
1484	1008	2005-08-20	2005-08-25	5
1485	1008	2005-08-25	2005-08-30	5
1486	1008	2005-08-30	2005-09-10	11
1487	1008	2005-09-10	2005-09-20	10
1488	1008	2005-09-20	2005-10-20	30
1489	1008	2005-10-20	2005-11-20	31
1490	1008	2005-11-20	2005-12-24	34
1491	1008	2005-12-24	2006-04-02	99
1492	1008	2006-04-02	2006-04-30	28
1493	20	2004-11-14	2005-03-31	137
1494	20	2005-03-31	2005-05-09	39
1495	20	2005-05-09	2005-06-03	25
1496	20	2005-06-03	2005-06-26	23
1497	20	2005-06-26	2005-07-05	9
1498	20	2005-07-05	2005-08-02	28
1499	20	2005-08-02	2005-09-10	39
1500	20	2005-09-10	2005-10-31	51
1501	20	2005-10-31	2005-12-30	60
1502	21	2005-01-10	2005-04-07	87
1503	21	2005-04-07	2005-05-09	32
1504	21	2005-05-09	2005-06-02	24
1505	21	2005-06-02	2005-06-22	20
1506	21	2005-06-22	2005-07-01	9
1507	21	2005-07-01	2005/08/01	31
1508	21	2005-08-01	2005-08-26	25
1509	21	2005-08-26	2005-10-17	52
1511	1001	2006-03-16	2006-04-27	42
1512	17	2005-03-01	2005-04-15	45
1513	17	2005-04-15	2005-05-31	46
1514	17	2005-05-31	2005-06-15	15
1515	17	2005-06-15	2005-07-01	16
1516	17	2005-07-01	2005-07-17	16
1517	17	2005-07-17	2005-08-31	45
1518	17	2005-08-31	2005-09-13	13
1519	17	2005-09-13	2005-10-04	21
1520	17	2005-10-04	2005-11-22	49
1521	17	2005-11-22	2006-03-18	116
1522	17	2006-03-18	2006-05-10	53
1523	32	2005-01-12	2005-03-08	55
1524	32	2005-03-08	2005-03-18	10
1525	32	2005-03-18	2005-04-15	28
1526	32	2005-04-15	2005-05-18	33
1527	32	2005-05-18	2005-06-06	19
1528	32	2005-06-06	2005-06-20	14
1529	32	2005-06-20	2005-06-30	10
1530	32	2005-06-30	2005-07-16	16
1531	32	2005-07-16	2005-08-03	18
1532	32	2005-08-03	2005-08-18	15
1533	32	2005-08-18	2005-08-30	12
1534	32	2005-08-30	2005-09-17	18
1535	32	2005-09-17	2005-10-03	16
1536	32	2005-10-03	2005-10-28	25
1537	32	2005-10-28	2005-11-20	23
1538	32	2005-11-20	2006-02-25	97
1539	32	2006-02-25	2006-05-05	69
1540	31	2005-01-24	2005-03-03	38
1541	31	2005-03-03	2005-03-31	28
1542	31	2005-03-31	2005-04-20	20
1543	31	2005-04-20	2005-05-09	19
1544	31	2005-05-09	2005-05-26	17
1545	31	2005-05-26	2005-06-23	28
1546	31	2005-06-23	2005-07-15	22
1547	31	2005-07-15	2005-08-01	17
1548	31	2005-08-01	2005-08-16	15
1549	31	2005-08-16	2005-09-05	20
1550	31	2005-09-05	2005-09-28	23
1551	31	2005-09-28	2005-10-19	21
1552	31	2005-10-19	2005-11-21	33
1553	31	2005-11-21	2006-01-04	44
1554	31	2006-01-04	2006/02/14	41
1555	31	2006-02-14	2006-04-03	48
1556	31	2006-04-03	2006-05-08	35
1557	8	2004-06-15	2004-06-28	13
1558	8	2004-06-28	2004-07-13	15
1559	8	2004-07-13	2004-07-29	16
1560	8	2004-07-29	2004-08-08	10
1561	8	2004-08-08	2004-08-27	19
1562	8	2004-08-27	2004-09-10	14
1563	8	2004-09-10	2004-12-17	98
1565	1001	2006-04-27	2006-05-18	21
1566	22	2006-04-04	2006-05-20	46
1567	1	2005-03-03	2005-04-09	37
1568	1	2005-04-09	2005-04-28	19
1569	1	2005-04-28	2005-05-19	21
1570	1	2005-05-19	2005-06-13	25
1571	1	2005-06-13	2005-07-06	23
1572	1	2005-07-06	2005-07-21	15
1573	1	2005-07-21	2005-08-04	14
1574	1	2005-08-04	2005-08-19	15
1575	1	2005-08-19	2005-09-21	33
1576	1	2005-09-21	2005-10-10	19
1577	1	2005-12-21	2006-04-03	103
1578	6	2004-12-06	2005-06-03	179
1579	6	2005-06-03	2005-06-30	27
1580	6	2005-06-30	2005-07-17	17
1581	6	2005-07-17	2005-08-22	36
1582	6	2005-08-22	2005-09-11	20
1583	6	2005-09-11	2005-10-02	21
1584	6	2005-10-02	2006-01-12	102
1585	6	2006-01-12	2006-05-07	115
1586	7	2004-12-06	2005-04-11	126
1587	7	2005-04-11	2005-04-28	17
1588	7	2005-04-28	2005-05-16	18
1589	7	2005-05-16	2005-05-24	8
1590	7	2005-05-24	2005-06-14	21
1591	7	2005-06-14	2005-07-04	20
1592	7	2005-07-04	2005-07-17	13
1593	7	2005-07-17	2005-08-16	30
1594	7	2005-08-16	2005-09-11	26
1595	7	2005-09-11	2005-09-26	15
1596	7	2005-09-26	2005-12-05	70
1597	7	2005-12-05	2006-01-16	42
1598	7	2006-01-16	2006-04-18	92
1599	8	2004-12-17	2005-04-30	134
1600	8	2005-04-30	2005-05-20	20
1601	8	2005-05-20	2005-06-20	31
1602	8	2005-06-20	2005-07-18	28
1603	8	2005-07-18	2005-09-05	49
1604	8	2005-09-05	2005-11-15	71
1605	8	2005-11-15	2006-04-05	141
1606	9	2005-05-01	2005-05-15	14
1607	9	2005-05-15	2005-05-28	13
1608	9	2005-05-28	2005-06-11	14
1609	9	2005-06-11	2005-06-24	13
1610	9	2005-06-24	2005-07-16	22
1611	9	2005-07-16	2005-08-06	21
1612	9	2005-08-06	2005-08-22	16
1613	9	2005-08-22	2005-09-05	14
1614	9	2005-09-05	2005-10-04	29
1615	9	2005-10-04	2005-10-21	17
1616	9	2005-10-21	2005-12-08	48
1617	10	2005-03-03	2005-03-30	27
1618	10	2005-03-30	2005-04-15	16
1619	10	2005-04-15	2005-05-03	18
1620	10	2005-05-03	2005-05-18	15
1621	10	2005-05-18	2005-05-31	13
1622	10	2005-05-31	2005-07-01	31
1623	10	2005-07-01	2005-07-15	14
1624	10	2005-07-15	2005-08-01	17
1625	10	2005-08-01	2005-08-15	14
1626	10	2005-08-15	2005-09-01	17
1627	10	2005-09-01	2005-09-16	15
1628	10	2005-09-16	2005-10-03	17
1629	10	2005-10-03	2005-10-24	21
1630	10	2005-10-24	2005-12-01	38
1631	10	2005-12-01	2006-05-11	161
1632	11	2004-10-09	2005-05-22	225
1633	11	2005-05-22	2005-06-06	15
1634	11	2005-06-06	2005-06-23	17
1635	11	2005-07-09	2005-08-14	36
1636	11	2005-08-14	2005-09-06	23
1637	11	2005-09-06	2005-09-25	19
1638	11	2005-09-25	2005-10-17	22
1639	13	2005-03-03	2005-04-28	56
1640	13	2005-04-28	2005-05-28	30
1641	13	2005-05-28	2005-06-15	18
1642	13	2005-06-15	2005-07-05	20
1643	13	2005-07-05	2005-07-12	7
1644	13	2005-07-12	2005-07-20	8
1645	13	2005-07-20	2005-07-26	6
1646	13	2005-07-26	2005-08-02	7
1647	13	2005-08-02	2005-08-23	21
1648	13	2005-08-23	2005-09-16	24
1649	14	2005-03-03	2005-04-28	56
1650	14	2005-04-28	2005-05-28	30
1651	14	2005-05-28	2005-06-15	18
1652	14	2005-06-15	2005-07-05	20
1653	14	2005-07-05	2005-07-19	14
1654	14	2005-07-19	2005-08-02	14
1655	14	2005-08-02	2005-08-23	21
1656	14	2005-08-23	2005-09-16	24
1657	14	2005-09-16	2006-04-24	220
1658	15	2005-03-03	2005-05-28	86
1659	15	2005-05-28	2005-07-05	38
1660	15	2005-07-05	2005-07-19	14
1661	15	2005-07-19	2005-08-02	14
1662	15	2005-08-02	2005-08-23	21
1663	15	2005-08-23	2005-09-16	24
1664	15	2005-09-16	2006-04-24	220
1665	16	2005-03-03	2005-05-28	86
1666	16	2005-05-28	2005-07-05	38
1667	16	2005-07-05	2005-07-19	14
1668	16	2005-07-19	2005-08-02	14
1669	16	2005-08-02	2005-08-23	21
1670	16	2005-08-23	2006-04-24	244
1671	24	2005/01/19	2005-04-30	101
1672	24	2005-04-30	2005-05-31	31
1673	24	2005-05-31	2005-07-20	50
1674	24	2005-07-20	2005-09-05	47
1675	24	2005-10-30	2006-04-15	167
1676	24	2006-04-15	2006-05-07	22
1677	26	2004-05-11	2004-06-05	25
1678	26	2004-06-05	2004-06-16	11
1679	26	2004-06-16	2004-07-05	19
1680	26	2004-07-05	2004-07-15	10
1681	26	2004-07-15	2004-07-28	13
1682	26	2004-08-13	2004-08-17	4
1683	26	2004-08-17	2004-08-26	9
1684	26	2004-08-26	2004-10-10	45
1685	26	2004-10-10	2004-11-07	28
1686	26	2004-11-07	2005-01-17	71
1687	26	2005-01-17	2005-04-12	85
1688	26	2005-04-12	2005-05-05	23
1689	26	2005-05-05	2005-05-27	22
1690	26	2005-05-27	2005-06-26	30
1691	26	2005-06-26	2005-07-19	23
1692	26	2005-07-19	2005-08-18	30
1693	26	2005-08-18	2005-09-12	25
1694	26	2005-09-12	2005-11-16	65
1695	26	2005-11-16	2006-03-23	127
1696	27	2005-03-04	2005-04-04	31
1697	27	2005-04-04	2005-04-11	7
1698	27	2005-04-11	2005-04-25	14
1699	27	2005-04-25	2005-05-09	14
1700	27	2005-05-09	2005-05-26	17
1701	27	2005-05-26	2005-06-13	18
1702	27	2005-06-13	2005-06-27	14
1703	27	2005-06-27	2005-07-17	20
1704	27	2005-07-17	2005-08-08	22
1705	27	2005-08-08	2005-08-22	14
1706	27	2005-08-22	2005-09-06	15
1707	27	2005-09-06	2005-09-21	15
1708	27	2005-09-21	2005-10-04	13
1709	27	2005-10-04	2005-10-28	24
1710	27	2005-10-28	2005-11-15	18
1711	27	2005-11-15	2005-12-07	22
1712	27	2005-12-07	2006-01-26	50
1713	27	2006-01-26	2006-03-07	40
1714	27	2006-03-07	2006-04-18	42
1715	27	2006-04-18	2006-05-11	23
1716	30	2005-05-18	2005-06-16	29
1717	30	2005-06-16	2005-07-17	31
1718	30	2005-08-15	2005-09-08	24
1719	30	2005-09-08	2006-04-21	225
1720	35	2005-04-09	2005-04-11	2
1721	35	2005-08-30	2005-09-12	13
1722	35	2005-09-12	2005-09-21	9
1723	35	2005-09-21	2005-10-16	25
1724	35	2005-10-16	2005-10-28	12
1725	22	2006-05-20	2006-06-28	39
1728	1001	2006-05-18	2006-06-15	28
1729	22	2006-06-28	2006-07-03	5
1730	22	2006-07-03	2006-07-20	17
1731	22	2006-07-20	2006-08-15	26
1732	1008	2006-04-30	2006-05-06	6
1733	1008	2006-05-06	2006-05-12	6
1734	1008	2006-05-12	2006-05-22	10
1735	1008	2006-05-22	2006-06-01	10
1736	1008	2006-06-01	2006-06-10	9
1737	1008	2006-06-10	2006-06-16	6
1738	1008	2006-06-16	2006-06-22	6
1739	1008	2006-06-22	2006-06-28	6
1740	1008	2006-06-28	2006-07-04	6
1741	1008	2006-07-04	2006-07-10	6
1742	1008	2006-07-10	2006-07-16	6
1743	1008	2006-07-16	2006-07-22	6
1744	1008	2006-07-22	2006-07-28	6
1745	1008	2006-07-28	2006-08-08	11
1746	1008	2006-08-08	2006-08-19	11
1747	1008	2006-08-19	2006-09-05	17
1748	13	2003-12-09	2004-03-25	107
1749	13	2004-03-25	2004-04-25	31
1750	13	2004-04-25	2004-05-25	30
1751	14	2003-12-09	2004-03-25	107
1752	14	2004-03-25	2004-04-25	31
1753	14	2004-04-25	2004-05-25	30
1754	15	2003-12-09	2004-03-25	107
1755	15	2004-03-25	2004-04-25	31
1756	15	2004-04-25	2004-05-25	30
1757	16	2003-12-09	2004-03-25	107
1758	16	2004-03-25	2004-04-24	30
1759	16	2004-04-24	2004-05-25	31
1760	33	2005-01-31	2005-02-19	19
1761	33	2005-02-19	2005-03-18	27
1762	33	2005-03-18	2005-04-05	18
1763	33	2005-04-05	2005-04-25	20
1764	33	2005-04-25	2005-05-11	16
1765	33	2005-05-11	2005-05-27	16
1766	33	2005-05-27	2005-06-10	14
1767	33	2005-06-10	2005-06-28	18
1768	33	2005-06-28	2005-07-13	15
1769	33	2005-07-13	2005-08-01	19
1770	33	2005-08-01	2005-08-22	21
1771	33	2005-08-22	2005-09-06	15
1772	41	2005-02-04	2005-04-08	63
1773	41	2005-04-08	2005-04-22	14
1774	41	2005-04-22	2005-05-07	15
1775	41	2005-05-07	2005-05-21	14
1776	41	2005-05-21	2005-06-05	15
1777	41	2005-06-05	2005-06-20	15
1778	41	2005-06-20	2005-07-17	27
1779	41	2005-07-17	2005-08-03	17
1780	41	2005-08-03	2005-08-21	18
1781	41	2005-08-21	2005-09-01	11
1782	35	2005-01-01	2005-03-29	87
1783	35	2005-03-29	2005-04-09	11
1784	35	2005-04-11	2005-04-30	19
1785	35	2005-04-30	2005-05-03	3
1786	35	2005-05-03	2005-05-25	22
1787	35	2005-05-25	2005-06-08	14
1788	35	2005-06-08	2005-06-27	19
1789	35	2005-06-27	2005-07-08	11
1790	35	2005-07-08	2005-07-13	5
1791	35	2005-07-13	2005-08-04	22
1792	35	2005-08-04	2005-08-15	11
1793	35	2005-08-15	2005-08-30	15
1794	1004	2005-01-20	2005-04-19	89
1795	1004	2005-04-19	2005-05-24	35
1796	1004	2005-05-24	2005-06-27	34
1797	1004	2005-06-27	2005-07-30	33
1798	1004	2005-07-30	2005-08-09	10
1799	39	2005-02-17	2005-04-22	64
1800	39	2005-04-22	2005-05-26	34
1801	39	2005-05-26	2005-06-20	25
1802	39	2005-06-20	2005-06-26	6
1803	39	2005-06-26	2005-07-06	10
1804	39	2005-07-06	2005-07-13	7
1805	39	2005-07-13	2005-07-21	8
1806	39	2005-07-21	2005-08-08	18
1807	39	2005-08-08	2005-08-15	7
1808	39	2005-08-15	2005-09-04	20
1809	40	2005-02-17	2005-04-22	64
1810	40	2005-04-22	2005-05-22	30
1811	40	2005-05-22	2005-06-20	29
1812	40	2005-06-20	2005-06-26	6
1813	40	2005-06-26	2005-07-05	9
1814	40	2005-07-05	2005-07-13	8
1815	40	2005-07-13	2005-07-22	9
1816	40	2005-07-22	2005-08-08	17
1817	40	2005-08-08	2005-08-15	7
1818	40	2005-08-15	2005-09-04	20
1819	37	2005-01-20	2005-04-14	84
1820	37	2005-04-14	2005-06-23	70
1821	37	2005-06-23	2005-07-07	14
1822	37	2005-07-07	2005-08-09	33
1823	37	2005-08-09	2005-08-24	15
1824	36	2005-01-20	2005-04-14	84
1825	36	2005-04-14	2005-06-22	69
1826	36	2005-06-22	2005-07-07	15
1827	36	2005-07-07	2005-08-09	33
1828	36	2005-08-09	2005-08-24	15
1829	22	2006-08-15	2006-09-06	22
1831	2	2005-06-09	2005-07-01	22
1832	2	2005-07-01	2005-07-22	21
1833	2	2005-07-22	2005-08-22	31
1834	2	2005-08-22	2005-09-12	21
1835	2	2005-09-12	2005-10-04	22
1836	2	2005-10-04	2005-11-03	30
1837	2	2005-11-03	2005-12-09	36
1838	2	2005-12-09	2006-05-08	150
1839	3	2005-06-09	2005-07-01	22
1840	3	2005-07-01	2005-07-22	21
1841	3	2005-07-22	2005-08-22	31
1842	3	2005-08-22	2005-09-12	21
1843	3	2005-09-12	2005-10-04	22
1844	3	2005-10-04	2005-11-03	30
1845	3	2005-11-03	2005-12-09	36
1846	3	2005-12-09	2006-05-08	150
1847	4	2005-06-09	2005-07-01	22
1848	4	2005-07-01	2005-07-22	21
1849	4	2005-07-22	2005-08-22	31
1850	4	2005-08-22	2005-09-12	21
1851	4	2005-09-12	2005-10-04	22
1852	4	2005-10-04	2005-11-03	30
1853	4	2005-11-03	2005-12-09	36
1854	4	2005-12-09	2006-05-08	150
1855	33	2005-09-06	2005-09-26	20
1856	33	2005-09-26	2005-10-11	15
1857	33	2005-10-11	2005-11-05	25
1858	33	2005-11-05	2005-11-22	17
1859	33	2005-11-22	2005-12-13	21
1860	33	2005-12-13	2006-01-04	22
1861	36	2005-08-24	2005-11-09	77
1862	36	2005-11-09	2006-05-07	179
1863	37	2005-08-24	2005-09-14	21
1864	37	2005-09-14	2005/11/09	56
1865	37	2005/11/09	2006-05-07	179
1866	38	2005-08-30	2005-09-06	7
1867	38	2005-09-06	2005-09-16	10
1868	38	2005-09-16	2005-09-21	5
1869	38	2005-09-21	2005-09-26	5
1870	38	2005-09-26	2005-10-04	8
1871	38	2005-10-04	2005-10-11	7
1872	38	2005-10-11	2005-10-20	9
1873	38	2005-10-20	2005-10-27	7
1874	38	2005-10-27	2005-11-08	12
1875	38	2005-11-08	2005-11-16	8
1876	38	2005-11-16	2005-11-28	12
1877	38	2005-11-28	2005-12-07	9
1878	38	2005-12-07	2005-12-15	8
1879	38	2005-12-15	2005-12-23	8
1880	38	2005-12-23	2006-02-02	41
1881	39	2005-09-04	2005-11-18	75
1882	39	2005-11-18	2006-01-13	56
1883	40	2005-09-04	2005-09-29	25
1884	40	2005-09-29	2005-11-20	52
1885	40	2005-11-20	2006-01-16	57
1886	41	2005-09-01	2005-09-21	20
1887	41	2005-09-21	2005-10-12	21
1888	41	2005-10-12	2005-11-23	42
1889	41	2005-11-23	2006-02-07	76
1890	1002	2005-09-12	2005-10-03	21
1891	1002	2005-10-03	2005-10-31	28
1892	1002	2005-10-31	2005-11-03	3
1893	1002	2005-11-03	2006-01-03	61
1894	1002	2006-01-03	2006-02-19	47
1895	1002	2006-02-19	2006-05-07	77
1896	1003	2005-09-12	2005-11-03	52
1897	1003	2006-02-19	2006-05-06	76
1898	1004	2005-08-09	2005-09-20	42
1899	1004	2005-09-20	2005-10-31	41
1900	1004	2005-10-31	2006-05-04	185
1901	1005	2005-09-26	2006-02-10	137
1902	1006	2005-09-26	2005-09-26	0
1903	43	2005-04-23	2005-05-06	13
1904	43	2005-05-06	2005-05-21	15
1905	43	2005-05-21	2005-06-02	12
1906	43	2005-06-02	2005-06-15	13
1907	43	2005-06-15	2005-06-29	14
1908	43	2005-06-29	2005-07-14	15
1909	43	2005-07-14	2005-07-27	13
1910	43	2005-07-27	2005-08-10	14
1911	43	2005-08-10	2005-08-25	15
1912	43	2005-08-25	2005-09-09	15
1913	43	2005-09-09	2005-09-21	12
1914	43	2005-09-21	2005-10-07	16
1915	43	2005-10-07	2005-10-19	12
1916	43	2005-10-19	2005-11-02	14
1917	43	2005-11-02	2005-11-16	14
1918	43	2005-11-16	2005-12-01	15
1919	43	2005-12-01	2006-05-02	152
1920	44	2005-04-20	2005-07-11	82
1921	44	2005-07-11	2005-07-28	17
1922	44	2005-07-28	2005-08-05	8
1923	44	2005-08-05	2005-08-17	12
1924	44	2005-08-17	2005-10-21	65
1925	44	2005-10-21	2006-06-24	246
1926	44	2006-06-24	2006-07-05	11
1927	45	2005-04-17	2005-05-15	28
1928	45	2005-05-15	2005-05-24	9
1929	45	2005-05-24	2005-06-10	17
1930	45	2005-06-10	2005-07-01	21
1931	45	2005-07-01	2005-07-09	8
1932	45	2005-07-09	2005-07-19	10
1933	45	2005-07-19	2005-07-28	9
1934	45	2005-07-28	2005-08-16	19
1935	45	2005-08-16	2005-09-11	26
1936	45	2005-09-11	2005-10-23	42
1937	45	2005-10-23	2005-11-13	21
1938	45	2005-11-13	2005-12-03	20
1939	45	2005-12-03	2006-02-03	62
1940	45	2006-02-03	2006-04-20	76
1941	45	2006-04-20	2006-05-16	26
1942	45	2006-05-16	2006-06-30	45
1943	45	2006-06-30	2006-07-05	5
1944	46	2004-12-20	2005-06-27	189
1945	46	2005-06-27	2005-07-17	20
1946	46	2005-07-17	2005-08-14	28
1947	46	2005-08-14	2005-09-05	22
1948	46	2005-09-05	2005-09-25	20
1949	46	2005-09-25	2005-10-13	18
1950	46	2005-10-13	2005-10-27	14
1951	46	2005-10-27	2006-01-02	67
1952	47	2004-10-18	2005-06-01	226
1953	47	2005-06-01	2005-06-15	14
1954	47	2005-06-15	2005-06-28	13
1955	47	2005-06-28	2005-07-15	17
1956	47	2005-07-15	2005-08-16	32
1957	47	2005-08-16	2005-08-31	15
1958	47	2005-08-31	2005-09-15	15
1959	47	2005-09-15	2005-10-10	25
1960	47	2005-10-10	2005-11-16	37
1961	48	2005-04-22	2005-06-21	60
1962	48	2005-06-21	2005-07-08	17
1963	48	2005-07-08	2005-07-21	13
1964	48	2005-07-21	2005-08-04	14
1965	48	2005-08-04	2005-08-16	12
1966	48	2005-08-16	2005-08-22	6
1967	48	2005-08-22	2005-09-30	39
1968	48	2005-09-30	2005-11-03	34
1969	48	2005-11-03	2005-12-28	55
1970	48	2005-12-28	2006-01-04	7
1971	50	2005-03-07	2005-06-13	98
1972	50	2005-06-13	2005-06-26	13
1973	50	2005-06-26	2005-07-06	10
1974	50	2005-07-06	2005-07-20	14
1975	50	2005-07-20	2005-07-27	7
1976	50	2005-07-27	2005-08-04	8
1977	50	2005-08-04	2005-08-10	6
1978	50	2005-08-10	2005-08-17	7
1979	50	2005-08-17	2005-08-21	4
1980	50	2005-08-21	2005-09-07	17
1981	1007	2006-06-26	2006-07-15	19
1982	1007	2005-07-01	2005-07-13	12
1983	1007	2005-07-13	2005-07-21	8
1984	1007	2005-07-21	2005-07-27	6
1985	1007	2005-07-27	2005-08-04	8
1986	1007	2005-08-04	2005-08-11	7
1987	1007	2005-08-11	2005-08-17	6
1988	1007	2005-08-17	2005-08-31	14
1989	1007	2005-08-31	2005-09-06	6
1990	1007	2005-09-06	2005-09-14	8
1991	1007	2006-06-01	2006-06-26	25
1992	1353	2005-07-07	2005-07-19	12
1993	1353	2005-07-19	2005-08-07	19
1994	1353	2005-08-07	2005-08-18	11
1995	1353	2005-08-18	2005-09-09	22
1996	1353	2005-09-09	2005-09-25	16
1997	1353	2005-09-25	2005-10-13	18
1998	1353	2005-10-13	2005-10-28	15
1999	14	2004-05-25	2004-06-08	14
2000	1008	2006-09-05	2006-10-13	38
2007	21	2005-10-17	2005-12-31	75
2008	1003	2005-11-03	2006-01-03	61
2009	1003	2006-01-03	2006-02-19	47
2010	2006	2007-04-11	2007-05-10	29
2011	2006	2007-05-10	2007-05-22	12
2012	2006	2007-05-22	2007-06-01	10
2013	2006	2007-06-01	2007-06-15	14
2014	2006	2007-06-15	2007-07-02	17
2015	2006	2007-07-02	2007-07-13	11
2016	2006	2007-07-13	2007-07-24	11
2017	2006	2007-07-24	2007-08-01	8
2018	2006	2007-08-01	2007-08-16	15
2019	2006	2007-08-16	2007-08-31	15
2020	2006	2007-08-31	2007-09-05	5
2021	2006	2007-09-05	2007-10-07	32
2022	2006	2007-10-07	2007-11-10	34
2023	2006	2007-11-10	2007-12-01	21
2024	2006	2007-12-01	2008-01-01	31
2025	2006	2008-01-01	2008-02-04	34
2026	2006	2008-02-04	2008-04-01	57
2027	2006	2008-04-01	2008-05-12	41
2028	2006	2008-05-12	2008-06-05	24
2029	2006	2008-06-05	2008-06-21	16
2030	2006	2008-06-21	2008-07-12	21
2031	2003	2006-03-01	2006-05-24	84
2032	2003	2006-05-24	2006-06-09	16
2033	2003	2006-06-09	2006-06-29	20
2034	2003	2006-06-29	2006-07-07	8
2035	2003	2006-07-07	2006-07-24	17
2036	2003	2006-07-24	2006-08-14	21
2037	2003	2006-08-14	2006-09-08	25
2038	2003	2006-09-08	2006-10-10	32
2039	2003	2006-10-10	2006-11-23	44
2040	2006	2008-07-12	2008-07-24	12
2041	2006	2008-07-24	2008-08-12	19
2042	2006	2008-08-12	2008-08-29	17
2043	2006	2008-08-29	2008-09-11	13
2044	2006	2008-09-11	2008-10-03	22
2045	2006	2008-10-03	2008-11-04	32
2047	2046	2008-01-01	2008-02-01	31
2048	2046	2008-02-01	2008-03-01	29
2049	2046	2008-03-01	2008-04-01	31
2050	2046	2008-04-01	2008-05-01	30
2051	2046	2008-05-01	2008-06-01	31
2052	2046	2008-06-01	2008-06-15	14
2053	2046	2008-06-15	2008-07-01	16
2054	2046	2008-07-01	2008-07-16	15
2055	2046	2008-07-16	2008-08-01	16
2056	2046	2008-08-01	2008-08-16	15
2057	2046	2008-08-16	2008-09-01	16
2058	2046	2008-09-01	2008-10-03	32
2059	2046	2008-10-03	2008-11-01	29
2060	2046	2008-11-01	2008-12-01	30
2061	2046	2008-12-01	2009-01-01	31
2062	49	2003-07-21	2003-08-05	15
2063	52	2003-09-01	2003-09-22	21
2064	9	2003-08-02	2003-08-13	11
2090	4	2005-03-21	2005-05-24	64
2091	4	2004-12-02	2005-01-28	57
2092	4	2005-01-28	2005-03-21	52
2093	4	2005-05-24	2005-06-09	16
2094	2	2004-12-02	2005-01-28	57
2095	2	2005-01-28	2005-03-21	52
2096	2	2005-03-21	2005-05-24	64
2097	2	2005-05-24	2005-06-09	16
2098	3	2004-12-02	2005-01-28	57
2099	3	2005-01-28	2005-03-21	52
2100	3	2005-03-21	2005-05-24	64
2101	3	2005-05-24	2005-06-09	16
2102	34	2003-07-05	2003-07-10	5
2103	24	2005-09-05	2005-10-30	55
2104	31	2004-11-03	2004-12-11	38
2105	40	2004-07-13	2004-07-30	17
2106	40	2005-01-05	2005-01-12	7
2107	18	2004-10-30	2004-11-15	16
2108	52	2003-12-02	2004-05-08	158
2109	48	2004-05-27	2004-06-13	17
2110	26	2004-07-28	2004-08-13	16
2111	36	2003-07-11	2003-07-25	14
2112	39	2004-11-01	2004-12-06	35
2113	50	2004/07/08	2004/07/30	22
5000	23	2004-07-02	2004-07-15	13
5003	30	2003-07-23	2003-08-01	9
5004	30	2004-04-24	2004-06-02	39
5005	30	2004-10-28	2005-05-18	202
5006	30	2006-04-21	2006-05-21	30
5007	30	2005-07-17	2005-08-15	29
5008	30	2004-06-02	2004-07-03	31
5009	7	2004-07-26	2004-08-18	23
5010	8	2003-09-07	2003-11-02	56
5011	8	2003-11-02	2004-04-19	169
5012	47	2003-09-14	2003-10-13	29
5013	11	2005-06-23	2005-07-09	16
5014	1	2005-10-10	2005-12-21	72
5015	35	2005-10-28	2005-11-04	7
5016	18	2004-11-15	2004-12-07	22
5017	30	2003-08-13	2004-04-24	255
