# Supplementary material for: The data of the Swedish Malaise Trap Project, a countrywide inventory of Sweden's insect fauna
Source: Biodivers Data J. 2020 Oct 23;8:e56286. doi: 10.3897/BDJ.8.e56286 (PMC7599202; doi:10.3897/BDJ.8.e56286)
Supplement: Supplementary material 3 — The current 79 datasets of the SMTP [file bdj-08-e56286-s003.xlsx]

## Sheet: Sheet1
Order	Dataset	Link to Dataset	Included Taxa	Order	DataType	Number specimens / observations	Identified by
1	Odonata	https://doi.org/10.15468/5gtjxx	Odonata: all families	Odonata	Abundance	116	Rasmus Hovmöller, Sibylle Häggqvist
2	Plecoptera	https://doi.org/10.15468/cvcqeb	Plecoptera: all families	Plecoptera	Abundance	3097	Anders Göthberg
3	Dermaptera	https://doi.org/10.15468/w5xcbu	Dermaptera: all families	Dermaptera	Abundance	102	Johannes Hallenbrant
4	Psocoptera	https://doi.org/10.15468/37b3pz	Psocoptera: all Psocodea except Phthiraptera	Psocoptera	Incidence	495	Bo W Svensson
5	Thysanoptera	https://doi.org/10.15468/8qm8rd	Thysanoptera: all families	Thysanoptera	Abundance	1528	Sverre Kobro
6	Auchenorrhyncha excl Delphacidae	https://doi.org/10.15468/b48ufy	Hemiptera: Auchenorrhyncha: Cicadidae, Cicadellidae, Ulopidae, Membracidae, Aphrophoridae, Achilidae, Caliscelidae, Cixiidae, Issidae	Hemiptera	Abundance	2171	Gösta Gillerfors (+)
7	Psylloidea	https://doi.org/10.15468/cdw57a	Hemiptera: Sternorhyncha: Psylloidea	Hemiptera	Incidence	312	Carl-Axel Gertsson
8	Coleoptera	https://doi.org/10.15468/87hk5a	Coleoptera: all families	Coleoptera	Abundance	5018	Bengt Andersson
9	Trichoptera	https://doi.org/10.15468/b3yrfu	Trichoptera: all families	Trichoptera	Abundance	3548	Anders Göthberg, Kjell Arne Johanson
10	Microlepidoptera	https://doi.org/10.15468/wxyx7e	Lepidoptera: Micropteridoidea, Eriocranioidea, Hepialoidea, Nepticuloidea, Adeloidea, Tischerioidea, Tineoidea, Gracillarioidea, Douglasioidea, Yponomeutoidea, Gelechioidea, Tortricoidea, Schreckensteinioidea, Epermenioidea, Urodoidea, Choreutoidea, Alucitoidea, Pterophoroidea, Pyraloidea, Cossoidea	Lepidoptera	Abundance	919	Mats Lindeborg
11	Macrolepidoptera	https://doi.org/10.15468/55t2ay	Lepidoptera: Zygaenoidea, Papilionoidea, Drepanoidea, Geometroidea, Lasiocampoidea, Bombycoidea, Sphingoidea, Noctuoidea	Lepidoptera	Abundance	425	Mats Lindeborg, Markus Franzén
12	Strepsiptera	https://doi.org/10.15468/5ag9hn	Strepsiptera: all families	Strepsiptera	Abundance	208	Rasmus Hovmöller
13	Mycetophilidae, Keroplatidae	https://doi.org/10.15468/dpa676	Mycetophilidae, Keroplatidae	Diptera	Abundance	826	Jostein Kjaerandsen, Svante Martinsson
14	Small Sciaroidea families	https://doi.org/10.15468/stg5z9	Diadocidiidae, Mycetobiidae, Ditomyiidae, Sciarosoma	Diptera	Abundance	141	Jostein Kjaerandsen, Svante Martinsson
15	Dixidae	https://doi.org/10.15468/u7dd6f	Dixidae	Diptera	Abundance	11	Svante Martinsson
16	Pachyneuridae	https://doi.org/10.15468/5epjpb	Pachyneuridae	Diptera	Abundance	10	Svante Martinsson
17	Cecidomyiidae: Porricondylinae (s lat)	https://doi.org/10.15468/hqpbmf	Cecidomyiidae: Porricondylinae, Winnertziinae	Diptera	Incidence	366	Mathias Jaschhof
18	Phoridae	https://doi.org/10.15468/ws6uh3	Phoridae	Diptera	Abundance	44132	Sven-Olov Ulefors
19	Dolichopodidae	https://doi.org/10.15468/rs389z	Dolichopodidae	Diptera	Abundance	43148	Marc Pollet
20	Drosophilidae	https://doi.org/10.15468/9sjvbp	Drosophilidae	Diptera	Abundance	7405	Gerhard Bächli
21	Sepsidae	https://doi.org/10.15468/a6ugn5	Sepsidae	Diptera	Abundance	5223	Rudolf Meier
22	Heleomyzidae, Odiniidae	https://doi.org/10.15468/gm4esc	Heleomyzidae	Diptera	Abundance	4921	Phil Withers
23	Chloropidae	https://doi.org/10.15468/xqyhd8	Chloropidae	Diptera	Abundance	1419	Emilia Nartshuk
24	Piophilidae	https://doi.org/10.15468/wchd9a	Piophilidae	Diptera	Abundance	1064	Phil Withers
25	Sciomyzidae	https://doi.org/10.15468/bdzv7j	Sciomyzidae	Diptera	Abundance	1023	Phil Withers
26	Lonchaeidae	https://doi.org/10.15468/8hsehm	Lonchaeidae	Diptera	Abundance	386	Iain McGowan
27	Milichiidae excl Phyllomyza	https://doi.org/10.15468/ajpx9r	Milichiidae excl Phyllomyza	Diptera	Abundance	738	Meike Schuppenhauer
28	Muscidae	https://doi.org/10.15468/s5y2mb	Muscidae	Diptera	Abundance	565	Stephane Lebrun
29	Anthomyzidae	https://doi.org/10.15468/zhb2jn	Anthomyzidae	Diptera	Abundance	549	Jindrich Rohacek
30	Tephritidae, Ulidiidae	https://doi.org/10.15468/y6dzym	Tephritidae, Ulidiidae	Diptera	Abundance	495	John Smit
31	Acartophthalmidae	https://doi.org/10.15468/nw85cf	Acartophthalmidae	Diptera	Abundance	358	Viktor Nilsson Örtman
32	Lauxaniidae	https://doi.org/10.15468/q6653a	Lauxaniidae	Diptera	Abundance	352	Viktor Nilsson Örtman
33	Trixoscelididae	https://doi.org/10.15468/7v7ybr	Trixoscelididae	Diptera	Abundance	245	Phil Withers
34	Pallopteridae	https://doi.org/10.15468/z244v6	Pallopteridae	Diptera	Abundance	231	Phil Withers
35	Asteiidae	https://doi.org/10.15468/z244v6	Asteiidae	Diptera	Abundance	151	Phil Withers
36	Syrphidae	https://doi.org/10.15468/4km26f	Syrphidae	Diptera	Abundance	134	Rune Bygebjer
37	Dryomyzidae	https://doi.org/10.15468/9s6ktn	Dryomyzidae	Diptera	Abundance	176	Phil Withers
38	Conopidae	https://doi.org/10.15468/2denvh	Conopidae	Diptera	Abundance	87	Fredrik Östrand
39	Aulacigastridae	https://doi.org/10.15468/n9qrv4	Aulacigastridae	Diptera	Abundance	73	Jan Willem van Zuijlen
40	Clusiidae	https://doi.org/10.15468/2ng6hg	Clusiidae	Diptera	Abundance	54	Viktor Nilsson Örtman
41	Asilidae	https://doi.org/10.15468/6d663p	Asilidae	Diptera	Abundance	269	Kevin Holston
42	Therevidae	https://doi.org/10.15468/3n7h7p	Therevidae	Diptera	Abundance	37	Kevin Holston
43	Symphyta	https://doi.org/10.15468/fag596	Xyelidae, Cephidae, Pamphiliidae, Siricidae, Xiphydriidae, Argidae, Blasticotomidae, Cimbicidae, Diprionidae, Tenthredinidae, Heptamelidae, Orussidae	Hymenoptera	Abundance	2912	Andrew Liston, Marko Prous & Andreas Taeger
44	Platygastridae (s str)	https://doi.org/10.15468/jh6duy	Platygastridae: Platygastridae	Hymenoptera	Abundance	3012	Peter N Buhl
45	Figitidae excl Charipinae	https://doi.org/10.15468/es2jyy	Figitidae: Anacharitinae, Aspicerinae, Eucoilinae, Figitinae	Hymenoptera	Abundance	1094	Mattias Forshage
46	Ismaridae	https://doi.org/10.15468/zx6dxp	Ismaridae	Hymenoptera	Abundance	260	Mareike Kiupel
47	Heloridae	https://doi.org/10.15468/wkxgbq	Heloridae	Hymenoptera	Abundance	136	Emilia Mühlhäuser
48	Evaniidae	https://doi.org/10.15468/t2nc3b	Evaniidae	Hymenoptera	Abundance	325	Joakim Pålsson
49	Gasteruptiidae, Aulacidae	https://doi.org/10.15468/xknzj2	Gasteruptiidae, Aulacidae	Hymenoptera	Abundance	50	Kees van Achterberg, Niklas Johansson, Mattias Forshage
50	Eupelmidae	https://doi.org/10.15468/y7ndas	Eupelmidae	Hymenoptera	Abundance	618	Lucian Fusu
51	Omphale	https://doi.org/10.15468/yvwnpu	Eulophidae: Entedoninae: Omphale	Hymenoptera	Abundance	189	Christer Hansson & Ekaterina Shevtsova
52	Mymar	https://doi.org/10.15468/sdgpvp	Mymaridae: Mymar	Hymenoptera	Abundance	13	Annie Lander
53	Ichneumoninae excl Phaeogenini	https://doi.org/10.15468/mer99q	Ichneumonidae: Ichneumoninae: Eurylabini, Goedartiini, Heresiarchini, Ichneumonini, Listrodromini, Oedicephalini, Platylabini, Zimmeriini	Hymenoptera	Abundance	5659	Matthias Riedel
54	Adelognathinae	https://doi.org/10.15468/f46vf7	Ichneumonidae: Adelognathinae	Hymenoptera	Abundance	503	Matthias Riedel
55	Diplazontinae	https://doi.org/10.15468/f9u8kc	Ichneumonidae: Diplazontinae	Hymenoptera	Abundance	2788	Seraina Klopfstein
56	Pimplinae	https://doi.org/10.15468/8pu4y5	Ichneumonidae: Pimplinae	Hymenoptera	Abundance	2224	Oleksandr Varga
57	Rhyssinae	https://doi.org/10.15468/at6azc	Ichneumonidae: Rhyssinae	Hymenoptera	Abundance	5	Oleksandr Varga
58	Poemeniinae	https://doi.org/10.15468/kq78ja	Ichneumonidae: Poemeniinae	Hymenoptera	Abundance	57	Oleksandr Varga, Jon Kanders
59	Xoridinae	https://doi.org/10.15468/btczj6	Ichneumonidae: Xoridinae	Hymenoptera	Abundance	115	Matthias Riedel
60	Phrudus group	https://doi.org/10.15468/bt7w4p	Ichneumonidae: Tersilochinae: Phrudus group	Hymenoptera	Abundance	488	Mareike Kiupel
61	Neorhacodes	https://doi.org/10.15468/saparq	Ichneumonidae: Neorhacodinae	Hymenoptera	Abundance	25	Pelle Magnusson
62	Banchini	https://doi.org/10.15468/h8jaj2	Ichneumonidae: Banchinae: Banchini	Hymenoptera	Abundance	218	Matthias Riedel
63	Netelia	https://doi.org/10.15468/p3r2rb	Ichneumonidae: Tryphoninae: Netelia	Hymenoptera	Abundance	40	Gavin Broad
64	Anomaloninae	https://doi.org/10.15468/4smbc7	Ichneumonidae: Anomaloninae	Hymenoptera	Abundance	32	Heinz Schnee
65	Brachycyrtinae	https://doi.org/10.15468/5zhs46	Ichneumonidae: Brachycyrtinae	Hymenoptera	Abundance	10	Pelle Magnusson
66	Diacritinae	https://doi.org/10.15468/zycqbx	Ichneumonidae: Diacritinae	Hymenoptera	Abundance	97	Pelle Magnusson
67	Cheloninae excl Adelius	https://doi.org/10.15468/68s836	Braconidae: Cheloninae excl. Adeliini	Hymenoptera	Abundance	182	Aurel Lozan
68	Meteorini	https://doi.org/10.15468/c5fqds	Braconidae: Euphorinae: Meteorini	Hymenoptera	Abundance	1322	Julia Stigenberg
69	Rogadinae	https://doi.org/10.15468/jmn2xn	Braconidae: Rogadinae	Hymenoptera	Abundance	161	Kees van Achterberg
70	Adelius	https://doi.org/10.15468/wg5p5e	Braconidae: Cheloninae: Adelius	Hymenoptera	Abundance	140	Mårten Eriksson
71	Pompilidae	https://doi.org/10.15468/62qwjj	Pompilidae	Hymenoptera	Abundance	2304	Johan Abenius
72	Dryinidae, Embolemidae	https://doi.org/10.15468/3k4v3x	Dryinidae, Embolemidae	Hymenoptera	Abundance	480	Massimo Olmi
73	Small families of parasitic aculeates	https://doi.org/10.15468/d8xe2j	Mutillidae, Myrmosidae, Tiphiidae, Methochidae, Sapygidae, Pompilidae	Hymenoptera	Abundance	204	Johan Abenius
74	Sphecidae (s lat)	https://doi.org/10.15468/bwhfe6	Crabronidae, Sphecidae, Ampulicidae	Hymenoptera	Abundance	56	Johan Abenius
75	Vespinae	https://doi.org/10.15468/qck78f	Vespidae: Vespinae	Hymenoptera	Abundance	240	William Englund, Urban Wahlstedt
76	Eumeninae	https://doi.org/10.15468/x656zx	Vespidae: Eumeninae	Hymenoptera	Abundance	53	Johan Abenius
77	Formicidae	https://doi.org/10.15468/hd5npb	Formicidae	Hymenoptera	Abundance	147	William Englund
78	Chrysididae	https://doi.org/10.15468/g44yc3	Chrysididae	Hymenoptera	Abundance	41	Villu Soon
79	Bethylidae	https://doi.org/10.15468/633y44	Bethylidae	Hymenoptera	Abundance	13	Mattias Forshage
